# Supplementary material for: Combining Genome-Wide Association Study and Gene-Based Haplotype Analysis to Identify Candidate Genes for Alkali Tolerance at the Germination Stage in Rice
Source: Front Plant Sci. 2022 Apr 8;13:887239. doi: 10.3389/fpls.2022.887239 (PMC9033254; doi:10.3389/fpls.2022.887239)
Supplement: Supplementary file 1 [file Data_Sheet_1.xlsx]

## Sheet: Supplementary Table 1
Supplementary Table S1. 428 rice accessions used in this study and phenotypic data.
ID	Accession name	K5 group in 3K-RG	K9 group in 3K-RG	MGTS	GRS	GIS	VIS	RLS	SLS	GES	MGTC	GRC	GIC	VIC	RLC	SLC	GEC	RMGT	RGR	RGI	RVI	RRL	RSL	RGE
B001	Heibiao	Geng	GJ-tmp	4	0.8	0.607619	2.73144	1.97083	4.5	0	4	0.95	0.721548	4.01038	8.75417	5.55917	0	1	0.842105	0.842105	0.681092	0.225131	0.809474	0
B004	Qiuguangtengxi 104	Geng	GJ-tmp	4.33611	0.816667	0.553611	1.87508	2.24167	3.38333	0	4	0.866667	0.658254	2.59631	7.90833	3.94583	0	1.08403	0.942308	0.84103	0.722211	0.283456	0.857445	0
B007	Tianhandao	Xian	XI-adm	5.91667	0.116667	0.0344444	0.158577	0.6375	4.55	0	3.36667	1	0.970635	6.00222	8.60833	6.18333	0.633333	1.75743	0.116667	0.0354865	0.0264198	0.0740561	0.735849	0
B009	Vietnam Zaodao	Xian	XI-1A	3.97654	0.916667	0.712897	2.82087	1.87083	3.95417	0.2	3.7	1	0.860913	4.04589	8.475	4.7	0.316667	1.07474	0.916667	0.828071	0.697217	0.220747	0.841312	0.473684
B010	Malaihong	Xian	XI-1A	3	0.0166667	0.0182143	0.050317	0.5875	2.80833	0	4.08421	0.983333	0.73881	3.56216	6.36111	4.82083	0.133333	0.734536	0.0169492	0.0246536	0.0141254	0.0923581	0.582541	0.125
B011	CO 22	Xian	XI-adm	4.03509	0.966667	0.725873	3.71768	1.82083	5.11667	0	4	0.983333	0.746865	4.42897	8.79583	5.92917	0	1.00877	0.983051	0.971893	0.8394	0.207011	0.862966	0
B012	2037(Rajahamsal)	Xian	XI-2	4.16026	0.616667	0.459484	2.35473	1.3875	5.12917	0.15	3.6386	0.966667	0.866706	5.45217	7.03917	6.2925	0.5	1.14337	0.637931	0.53015	0.431889	0.197111	0.815124	0.366667
B014	Wuziluosi 215	Geng	GJ-tmp	4.3547	0.616667	0.414206	1.50266	2.3125	3.625	0	4	0.816667	0.620278	3.18668	8.69167	5.13333	0	1.08868	0.755102	0.667776	0.471546	0.266059	0.706169	0
B015	Kahamu	Xian	XI-1A	4.25794	0.633333	0.439365	1.46323	1.025	3.32917	0	4	1	0.759524	3.24063	6.02083	4.26667	0	1.06448	0.633333	0.578474	0.451525	0.170242	0.780273	0
B021	Seln 244A6-20	Xian	XI-adm	5.78571	0.133333	0.0077381	0.237189	0.733333	3.56667	0	3.17281	0.966667	1.00087	4.95029	5.78333	4.94583	0.8	1.82353	0.137931	0.00773135	0.0479142	0.126801	0.721146	0
B029	Dumai	Xian	XI-1B	4.18194	0.85	0.608095	2.72379	1.57083	4.45833	0	3.66667	1	0.874802	5.63101	7.65417	6.43333	0.383333	1.14053	0.85	0.695124	0.483713	0.205226	0.693005	0
B030	Jaibattey	Xian	XI-adm	3.88333	1	0.80119	3.88458	2.75	4.85	0.2	3.3	1	0.992857	5.61392	7.35833	5.65417	0.775	1.17677	1	0.806954	0.691954	0.373726	0.857775	0.193548
B034	Albania Rice	Geng	GJ-tmp	4.02222	0.888889	0.689206	3.48652	1.77083	5.0375	0.266667	3.23016	0.955556	0.960952	7.09577	8.96667	7.38333	0.755556	1.24521	0.930233	0.717212	0.491353	0.197491	0.68228	0.294118
B035	American Rice	Xian	XI-adm	5.22807	0.95	0.459048	1.35634	1.46667	2.95	0	4.11667	1	0.740913	3.07861	8.0625	4.14583	0.15	1.26998	0.95	0.61957	0.44057	0.181912	0.711558	0
B044	Santiannuo	Xian	XI-adm	4.16908	0.866667	0.630476	2.17224	1.39583	3.375	0.0666667	3.31111	1	0.977249	5.85731	7.08214	5.99405	0.688889	1.25912	0.866667	0.645154	0.37086	0.197092	0.563059	0.0967742
B056	Tieganwu	Geng	GJ-tmp	3.78333	1	0.849246	3.45916	2.13333	4.075	0.35	3.58333	1	0.902579	5.50395	8.39167	6.11667	0.55	1.05581	1	0.94091	0.628486	0.25422	0.666213	0.757576
B058	Erjiunan 1	Xian	XI-1B	4.225	0.216667	0.230179	0.595772	0.845833	3.63333	0.05	3.99717	0.95	0.732659	4.22669	6.91667	5.775	0.133333	1.057	0.22807	0.314169	0.140955	0.122289	0.629149	0.125
B060	Aijiaonante	Xian	XI-1A	4.06061	0.35	0.2575	0.620673	0.983333	3.3	0	3.63333	1	0.890357	4.65795	8.3375	5.23333	0.45	1.1176	0.35	0.28921	0.13325	0.117941	0.630573	0
B064	Xiangzaoxian 7	Xian	XI-adm	4.30769	0.483333	0.520655	1.92736	1.25	3.33333	0.15	3.52544	0.983333	0.902421	4.16971	5.08333	4.61964	0.466667	1.22189	0.491525	0.576954	0.462229	0.245902	0.721557	0.214286
B067	Funingzipigengzi	Xian	XI-1A	3.33333	0.1	0.0995635	0.483775	0.5875	3.09167	0.1	3.94444	0.966667	0.770595	3.81834	6.84583	4.95417	0.266667	0.84507	0.103448	0.129203	0.126698	0.0858186	0.624054	0.3125
B069	Dandongludao	Geng	GJ-adm	4.10556	0.933333	0.693611	2.97348	3.21667	4.2875	0.2	3.81667	1	0.822024	4.47124	9.82083	5.44167	0.2	1.07569	0.933333	0.843785	0.665024	0.327535	0.787902	0.583333
B071	Muxiqiu	Geng	GJ-tmp	3.99903	0.9	0.696071	2.72664	1.39583	3.90833	0.2	3.72807	0.983333	0.844087	5.23016	8.15	6.19583	0.366667	1.07268	0.915254	0.824644	0.521332	0.171268	0.6308	0.409091
B074	Taishannuo	Xian	XI-1A	3.7381	0.25	0.213492	0.900783	0.766667	3.11667	0.05	3.65604	0.95	0.837103	4.15163	8.975	4.95833	0.55	1.02244	0.263158	0.255037	0.216971	0.0854225	0.628571	0.242424
B075	Jinbaoyin	Xian	XI-adm	3.52695	0.9	0.83496	4.40382	2.79167	5.26667	0.3	3.11667	1	1.05536	7.04951	8.775	6.67917	0.9	1.13164	0.9	0.791164	0.624698	0.318139	0.788522	0.574074
B076	Minbeiwanxian	Xian	XI-adm	3.35	1	0.977579	5.63393	3.70833	5.75	0.6	3.08519	0.966667	1.02865	8.01554	8.91667	7.80417	0.883333	1.08583	1.03448	0.950351	0.702876	0.415888	0.736786	0.754717
B077	Yizhixiang	Geng	GJ-tmp	3.73179	0.933333	0.797778	3.52146	1.41667	4.4125	0.4	3.50331	0.95	0.884048	5.31295	7.99583	6.0125	0.55	1.06522	0.982456	0.902415	0.662807	0.177176	0.733888	0.575758
B082	Qiyuexian	Xian	XI-adm	4.33333	0.15	0.0980952	0.400304	0.545833	3.05417	0	3.72719	0.983333	0.840754	4.60355	7.79167	5.475	0.316667	1.16263	0.152542	0.116675	0.0869555	0.0700535	0.557839	0
B083	Dongtingwanxian	Xian	XI-1A	3.92593	0.883333	0.694524	2.71073	1.59583	3.9	0.05	3.5	1	0.933413	5.07181	6.85417	5.43333	0.566667	1.12169	0.883333	0.744069	0.534471	0.232827	0.717791	0.147059
B089	Qitoubaigu3	Xian	XI-adm	4.38528	0.366667	0.235159	0.951348	0.936905	4.05417	0	4.11611	0.883333	0.650913	3.35929	9.11786	5.13988	0.05	1.0654	0.415094	0.361275	0.283199	0.102755	0.788767	0
B095	Mowangguneiza	Xian	XI-adm	4.55833	0.25	0.160992	0.669104	0.858333	4.175	0.05	3.80088	0.983333	0.817698	4.80794	8	5.8875	0.25	1.19928	0.254237	0.196884	0.139166	0.107292	0.70913	0.133333
B103	Laohongdao	Geng	GJ-tmp	4.09259	0.9	0.672183	2.6968	1.83333	4.0125	0.1	3.61053	0.983333	0.877421	4.3796	9.03333	4.98333	0.416667	1.13352	0.915254	0.766089	0.615765	0.202952	0.805184	0.2
B105	Baoxuan 21	Xian	XI-adm	3.32063	0.65	0.638135	1.99765	1.02917	3.12917	0.4	3.16765	0.95	0.992381	4.62095	5.59167	4.65833	0.85	1.0483	0.684211	0.643034	0.432304	0.184054	0.671735	0.509804
B106	Wenxiangnuo	Xian	XI-adm	4.36984	0.716667	0.487381	1.90197	0.995238	3.89583	0.05	3.34649	0.966667	0.946706	4.53443	6.95417	4.7875	0.65	1.3058	0.741379	0.514817	0.419451	0.143114	0.813751	0.102564
B119	Guangluai 15-	Xian	XI-1A	3.81111	0.616667	0.508651	1.63216	0.954167	3.2	0.25	3	0.966667	1.05643	5.30309	7.9	5.02083	0.966667	1.27037	0.637931	0.481481	0.307775	0.120781	0.637344	0.189655
B126	Zaoxian 240	Xian	XI-1A	3.66667	0.383333	0.338651	1.08786	0.8875	3.1875	0.2	3.05458	0.916667	0.985119	4.66312	8.725	4.72917	0.866667	1.20038	0.418182	0.343766	0.23329	0.101719	0.674009	0.230769
B131	Aizizhan	Xian	XI-adm	3.58631	0.733333	0.666706	2.80579	0.795833	4.19583	0.45	3.15	1	1.04425	6.23347	11.7702	5.96667	0.866667	1.13851	0.733333	0.638457	0.450117	0.067614	0.703212	0.480769
B132	Xiaobaimi	Xian	XI-adm	3.35185	0.35	0.333889	1.30281	1.28333	3.85	0.2	3.2693	0.983333	0.988532	5.7827	11.1875	5.84583	0.75	1.02525	0.355932	0.337762	0.225294	0.114711	0.658589	0.288889
B133	Yanshuichi	Xian	XI-adm	3.33971	0.883333	0.865357	3.47613	1.18333	4.00417	0.5	3.13333	1	1.04841	6.39859	6.86429	6.10833	0.866667	1.06586	0.883333	0.825397	0.543265	0.17239	0.655525	0.673077
B137	80B	Xian	XI-adm	4.12549	0.816667	0.6225	2.48263	1.65	3.98333	0.25	3.37454	0.816667	0.796667	4.26876	9.14167	5.36667	0.5	1.22254	1	0.781381	0.581581	0.180492	0.742236	0.5
B140	Pei C122	Xian	XI-1A	4.2399	0.566667	0.405397	1.77807	1.16607	4.375	0.1	3.60965	0.983333	0.876032	5.55269	6.36667	6.34167	0.4	1.1746	0.576271	0.462765	0.320219	0.183153	0.689882	0.25
B150	L 301B	Xian	XI-1A	3.79237	0.783333	0.656071	2.70424	1.61667	4.09167	0.2	3.68421	0.95	0.826548	5.01113	7.7125	6.05833	0.35	1.02936	0.824561	0.793749	0.539647	0.209616	0.675378	0.666667
B151	Jinnante 43B	Xian	XI-1A	3	0.1	0.109286	0.375214	0.800595	3.3625	0.15	3.79737	0.983333	0.822698	4.10263	7.3875	4.9875	0.3	0.790021	0.101695	0.132838	0.0914571	0.108372	0.674185	0.333333
B152	Zaoshunonghu 6	Geng	GJ-tmp	5.07955	0.616667	0.317817	0.79985	1.27083	2.5125	0	3.78843	0.9	0.748849	3.344	9.77917	4.45	0.233333	1.34081	0.685185	0.424408	0.23919	0.129953	0.564607	0.0714286
B154	Liming B	Geng	GJ-tmp	5.07407	0.216667	0.0934524	0.127391	0.833333	2.5875	0	3.82451	0.95	0.784048	3.70149	8.51667	4.70417	0.25	1.32673	0.22807	0.119192	0.0344161	0.0978474	0.550044	0
B155	Baoxie -7B	Xian	XI-adm	4.22222	0.166667	0.119087	0.481881	0.773611	4.02083	0	3.75877	0.966667	0.811984	4.83804	7.89167	5.9625	0.233333	1.1233	0.172414	0.146662	0.0996025	0.0980289	0.674354	0
B156	G Zhenshan 97B	Xian	XI-1A	3.85669	0.5	0.409206	2.34411	1.04583	4.00833	0.3	3.80292	0.95	0.788214	4.28928	6.99167	5.44167	0.25	1.01414	0.526316	0.519156	0.546504	0.149583	0.7366	0.733333
B157	88B	Xian	XI-1A	4.2381	0.25	0.171825	0.827115	1.5125	3.34167	0.1	3.92472	0.9	0.711349	4.1514	6.7	5.84167	0.133333	1.07985	0.277778	0.241549	0.199237	0.225746	0.57204	0.25
B162	Baigedao	Geng	GJ-tmp	4.50539	0.9	0.582183	2.38179	1.49167	4.075	0.1	3.87171	0.9	0.728849	4.216	7.6125	5.77083	0.3	1.16367	1	0.79877	0.564941	0.19595	0.706137	0.111111
B166	Jianghuadao	Geng	GJ-tmp	4.78333	0.75	0.435754	1.41541	1.525	3.20833	0	3.94932	0.933333	0.731111	4.10976	10.9208	5.6125	0.116667	1.21118	0.803571	0.596016	0.344402	0.139641	0.571641	0
B170	Hongse 90	Geng	GJ-tmp	6.23333	0.233333	0.0638889	0.200094	0.8125	3.1	0	4.25463	0.866667	0.606865	2.84608	9.21488	4.70179	0.0333333	1.46507	0.269231	0.105277	0.0703053	0.0881726	0.659324	0
B191	80A60YR71009-1-5	Geng	GJ-trp	4.10417	0.783333	0.589127	2.07926	1.50833	3.52917	0.15	3.3942	0.85	0.819206	4.02172	10.4583	4.90417	0.533333	1.20917	0.921569	0.719144	0.517007	0.144223	0.719626	0.28125
B196	Taidongludao	Geng	GJ-trp	6.05006	0.633333	0.291131	0.696751	1.1375	3.16667	0	3.92963	0.9	0.70996	3.42516	8.40417	4.84167	0.116667	1.5396	0.703704	0.410067	0.203421	0.13535	0.654045	0
B199	Hongmisandan	Geng	GJ-tmp	4.86111	0.6	0.504821	1.83045	1.23125	3.20833	0	3.51667	1	0.922024	4.73661	8.52083	5.13333	0.5	1.38231	0.6	0.547515	0.386446	0.144499	0.625	0
B203	Biwusheng	Xian	XI-adm	3.26267	0.95	0.957659	4.56975	2.20417	4.77083	0.8	3.11842	0.983333	1.03714	6.34573	10.2125	6.12083	0.883333	1.04626	0.966102	0.923362	0.72013	0.21583	0.779442	0.830189
B207	Aihechi	Xian	XI-adm	3.40196	0.9	0.862738	3.92151	2.0625	4.54167	0.55	3.15614	0.966667	1.00643	5.81682	9.36488	5.78214	0.816667	1.07789	0.931034	0.857227	0.674167	0.220238	0.785464	0.673469
B208	Lucaihao	Xian	XI-1A	4.32479	0.55	0.377183	1.44129	1.09167	3.8125	0.05	3.91579	0.983333	0.781587	4.33822	8.8625	5.54583	0.166667	1.10445	0.559322	0.482585	0.33223	0.123178	0.687453	0.2
B210	Nanxiongzaoyouzhan	Xian	XI-1A	3.6614	0.983333	0.862143	4.05554	1.7125	4.70417	0.45	3.26667	1	1.00397	6.86992	9.99167	6.84583	0.733333	1.12084	0.983333	0.858735	0.590334	0.171393	0.687158	0.522727
B217	Honggu	Xian	XI-1B	4.85714	0.133333	0.0762698	0.8235	0.916667	3.92917	0	3.8307	0.983333	0.802421	4.45683	9.57083	5.55833	0.166667	1.26795	0.135593	0.0950497	0.184773	0.0957771	0.706897	0
B219	Haolai	Xian	XI-adm	4.15152	0.577778	0.409206	1.51893	1.25	3.70833	0.0666667	3.53333	1	0.903175	5.7458	8.40417	6.3625	0.466667	1.17496	0.577778	0.453076	0.264355	0.148736	0.582842	0.238095
B226	Heimangdao	Geng	GJ-tmp	4.69673	0.65	0.392579	2.41915	1.92917	6.025	0.05	3.58056	0.816667	0.735556	6.1598	9.90357	8.38333	0.325	1.31173	0.795918	0.533718	0.392732	0.194795	0.718688	0.205128
B228	Haobayong 1	Geng	GJ-adm	4.41285	0.916667	0.614563	2.52875	1.32143	4.10833	0.1	3.75	1	0.85119	4.7503	10.625	5.57083	0.35	1.17676	0.916667	0.722005	0.532335	0.12437	0.737472	0.190476
B232	Xiangaizao 10hao	Xian	XI-1B	3	0.0166667	0.0182143	0.182371	0.6125	3.3	0.05	3.346	0.916667	0.901786	4.714	7.99167	5.225	0.666667	0.896592	0.0181818	0.020198	0.038687	0.0766423	0.631579	0.025
B233	Xiangwanxian 1	Xian	XI-adm	4	0.466667	0.357222	1.22115	0.945833	3.42083	0.05	3.22281	0.966667	0.984206	5.15136	9.32083	5.23333	0.75	1.24115	0.482759	0.362955	0.237055	0.101475	0.653662	0.111111
B235	Zhonghua 8	Geng	GJ-tmp	6.19524	0.4	0.132698	0.413523	0.847619	3.07083	0	3.09216	0.916667	0.976786	5.2632	11.0667	5.39167	0.866667	2.00353	0.436364	0.135852	0.0785688	0.0765921	0.569552	0.0192308
B240	Zhengdao 5	Geng	GJ-tmp	6.27381	0.3	0.0761905	0.235744	1.15417	3.02083	0	3.71696	0.95	0.813214	3.76038	7.5244	4.625	0.3	1.68789	0.315789	0.0936905	0.0626915	0.15339	0.653153	0
B241	Lamujia	Geng	GJ-sbtrp	3.84615	0.433333	0.527024	2.00269	1.01667	3.57917	0.1	3.43333	1	0.949802	5.51432	7.73333	5.8	0.583333	1.12024	0.433333	0.554878	0.36318	0.131466	0.617098	0.114286
B249	Chaoyangyihao B	Xian	XI-1A	3	0.4	0.437143	1.34626	0.783333	3.0875	0.35	3.2	1	1.02758	4.7789	8.72083	4.64583	0.816667	0.9375	0.4	0.42541	0.28171	0.0898232	0.664574	0.489796
B250	Annongwangeng B	Geng	GJ-tmp	3.98611	0.2	0.168016	0.246824	0.895833	3.37917	0.2	3.68596	0.966667	0.835595	4.23656	7.25	5.06667	0.4	1.08143	0.206897	0.201073	0.0582606	0.123563	0.666941	0.208333
B258	Xingguo	Geng	GJ-tmp	3.71429	0.933333	0.801481	2.58287	1.60833	3.22083	0	3.52063	0.977778	0.886296	5.43612	9.39762	6.12917	0.466667	1.055	0.954545	0.904304	0.47513	0.171143	0.525493	0.5
CX3	BR24	Xian	XI-1A	3.22619	0.583333	0.591667	3.07294	1.07083	5.14583	0.45	3.18333	1	1.03313	6.76097	5.49167	6.54583	0.833333	1.01346	0.583333	0.572691	0.454512	0.194992	0.786123	0.58
CX18	Zaoxian 14	Xian	XI-1A	3.47037	0.7	0.653889	2.66353	1.55774	4.0625	0.3	3.31365	0.95	0.945992	5.16452	5.19583	5.4625	0.733333	1.0473	0.736842	0.69122	0.515737	0.299805	0.743707	0.568182
CX54	Linyitangdao	Xian	XI-adm	3.525	0.766667	0.715913	3.50682	3	4.90417	0.55	3.15789	0.95	0.988214	6.20107	8.48333	6.26667	0.8	1.11625	0.807018	0.724451	0.565519	0.353635	0.78258	0.604167
CX57	Zhongchao 123	Geng	GJ-tmp	4.37879	0.566667	0.380397	1.66206	1.72917	4.375	0	3.53813	0.866667	0.794365	4.64302	6.87917	5.85	0.433333	1.2376	0.653846	0.478869	0.357969	0.251363	0.747863	0.115385
CX97	Budda	Xian	XI-1B	4.24573	0.483333	0.339603	1.41826	1.57778	4.15417	0	4.01754	0.95	0.717381	3.44681	6.9875	4.80833	0	1.0568	0.508772	0.473393	0.411471	0.2258	0.863951	0
CX108	Ziri	Admix	admix	3.56566	0.783333	0.704683	3.33106	2.20417	4.70417	0.3	3.28772	0.983333	0.981587	6.29086	7.4875	6.40833	0.716667	1.08454	0.79661	0.717901	0.529508	0.29438	0.73407	0.511628
CX116	Wudadaozhong	Geng	GJ-tmp	4.85324	0.9	0.518016	2.19076	2.11667	4.22083	0.1	3.82571	0.866667	0.721032	4.32906	10.1792	6.0125	0.283333	1.26859	1.03846	0.718437	0.506059	0.207941	0.70201	0.352941
CX128	Gajale	Xian	XI-adm	3.59444	0.566667	0.515119	2.82422	1.67917	5.47917	0.4	3.20819	0.95	0.971548	6.49043	6.95417	6.67917	0.75	1.1204	0.596491	0.530205	0.435136	0.241462	0.820337	0.422222
CX140	Nipponbare	Geng	GJ-tmp	4.25238	0.733333	0.513929	1.94361	1.75833	3.79167	0	3.64491	0.9	0.790516	3.90315	7.91329	4.93651	0.333333	1.16666	0.814815	0.650118	0.49796	0.2222	0.768087	0.1
CX150	Chorofa	Xian	XI-1B	4.16527	0.8	0.574286	2.50275	1.89583	4.35833	0	4.05676	0.916667	0.684563	3.5228	5.40571	5.14893	0	1.02675	0.872727	0.838908	0.710442	0.350709	0.846454	0
CX154	Khao Dawk Mali 105	Xian	XI-3	4.06425	0.783333	0.58246	2.64518	1.79167	4.54583	0	3.64298	0.983333	0.864921	5.02028	5.13333	5.80417	0.366667	1.11564	0.79661	0.673426	0.526899	0.349026	0.783202	0
CX165	Wuyugeng 3	Geng	GJ-tmp	4.95861	0.85	0.471429	1.51216	2.16667	3.2125	0	4.06266	0.8	0.60623	2.74304	9.01667	4.53333	0.133333	1.22053	1.0625	0.77764	0.551271	0.240296	0.70864	0.25
CX221	Zhongyouzao 81	Xian	XI-adm	3.35198	0.822222	0.802275	3.06212	1.5625	3.8125	0.466667	3.19048	0.933333	0.94963	5.91926	5.97143	6.23155	0.755556	1.05062	0.880952	0.84483	0.517315	0.261663	0.611806	0.705882
CX227	KASALATH	Aus	cA (Aus)	4.21429	0.666667	0.471349	2.29876	1.425	4.87738	0	4.03606	0.95	0.713214	4.26967	10.2	5.97917	0	1.04416	0.701754	0.66088	0.538394	0.139706	0.815729	0
CX228	Bala	Xian	XI-adm	3.74679	0.483333	0.424881	1.82198	0.858036	3.8875	0.2	3.33392	0.95	0.934048	5.01896	5.27667	5.37	0.65	1.12384	0.508772	0.454881	0.36302	0.162609	0.723929	0.435897
CX231	IR52561-UBN-1-1-2	Xian	XI-adm	3.40926	0.966667	0.925873	4.91235	2.70417	5.3	0.55	3.15	1	1.04786	6.86712	4.84583	6.55417	0.9	1.0823	0.966667	0.883587	0.715343	0.55804	0.808646	0.666667
CX250	829	Xian	XI-1B	3.96852	0.966667	0.765873	4.24317	2.62917	5.54167	0.15	3.45556	0.966667	0.916151	5.97294	5.7125	6.5125	0.583333	1.14845	1	0.835968	0.7104	0.460248	0.850928	0.428571
CX251	Xudao 4	Geng	GJ-tmp	4.08889	0.783333	0.588294	2.66918	3.52083	4.52917	0.15	3.66686	0.866667	0.762421	4.2603	8.73929	5.60893	0.4	1.11509	0.903846	0.771613	0.626524	0.402874	0.807492	0.25
CX273	NONA BOKRA	Xian	XI-adm	3.25	1	1.00952	5.39827	3.0625	5.34583	0.75	3.18333	1	1.03452	6.91848	5.13056	6.6875	0.85	1.02094	1	0.975834	0.780269	0.596914	0.799377	0.882353
CX276	IR8192-200-3-3-1-1	Xian	XI-1B	3.94444	0.933333	0.739167	3.56746	1.87083	4.83333	0.1	3.56667	1	0.910357	5.17899	5.38155	5.69524	0.5	1.10592	0.933333	0.811952	0.688833	0.347639	0.848662	0.366667
CX282	Lijiangxintuanheigu	Geng	GJ-adm	4.35	0.566667	0.37373	1.47985	1.21667	3.99583	0	3.64259	0.933333	0.827778	4.4061	7.42083	5.325	0.416667	1.1942	0.607143	0.451486	0.335864	0.163953	0.750391	0
CX290	Duo 57	Xian	XI-1B	3.66667	0.05	0.0435317	0.22217	0.797321	5.10417	0	3.5	1	0.930357	5.70391	4.85833	6.125	0.55	1.04762	0.05	0.0467904	0.0389505	0.164114	0.833333	0.030303
CX315	Zidao	Geng	GJ-tmp	3.93333	0.966667	0.77254	2.88197	1.7375	3.74583	0.3	3.50926	0.966667	0.891151	4.53034	7.975	5.08333	0.483333	1.12084	1	0.866901	0.636149	0.217868	0.736885	0.517241
CX329	Jinchuanyihao	Geng	GJ-tmp	4.23876	0.7	0.509722	2.01276	1.3	3.92083	0.2	3.79561	0.966667	0.807817	4.05022	8.92917	5.00417	0.283333	1.11675	0.724138	0.630987	0.49695	0.14559	0.783514	0.411765
CX330	Yueguang	Geng	GJ-tmp	4.48942	0.65	0.422024	1.7972	1.57917	4.225	0	3.63305	0.8	0.709841	3.72298	9.06667	5.24167	0.366667	1.23572	0.8125	0.594533	0.482731	0.174173	0.806041	0
CX372	NERICA 2	Geng	GJ-trp	5.08889	0.616667	0.304206	1.05584	2.00833	3.5	0	4.50614	0.95	0.605159	2.69683	7.29167	4.45417	0.0333333	1.12932	0.649123	0.502689	0.391511	0.275429	0.785781	0
CX373	NERICA 8	Geng	GJ-trp	4.41481	0.966667	0.63504	2.68044	3.19167	4.22083	0	3.9	1	0.802857	4.4089	9.2125	5.49167	0.2	1.132	0.966667	0.790975	0.60796	0.34645	0.768589	0
CX548	Zhongjian 100	Xian	XI-adm	4.83333	0.0666667	0.0381349	0.130616	0.774405	3.45	0	3.64474	0.983333	0.863532	3.98592	4.75	4.61667	0.35	1.32611	0.0677966	0.0441616	0.0327693	0.163033	0.747292	0
IRIS_313-7690	IR 2344-P1 PB-9-3-2B	Xian	XI-adm	3.56765	0.866667	0.79381	3.50553	1.7375	4.39583	0.55	3.18947	0.983333	1.01353	6.23677	7.21667	6.14167	0.8	1.11857	0.881356	0.783211	0.562074	0.240762	0.715739	0.583333
IRIS_313-7736	NONA BOKRA	Xian	XI-2	3.45098	0.85	0.809484	4.66571	1.6	5.76667	0.55	3.11667	1	1.05675	7.54572	9.35833	7.14167	0.916667	1.10727	0.85	0.766016	0.618325	0.170971	0.807468	0.618182
IRIS_313-7778	SOM CAU 70 A	Xian	XI-adm	4.09524	0.25	0.182937	0.59856	0.866667	3.23333	0	3.94825	0.966667	0.750873	3.88492	5.725	5.175	0.05	1.03723	0.258621	0.243632	0.154073	0.151383	0.624799	0.333333
IRIS_313-8026	GIOVANNI MARCHETTI	Geng	GJ-tmp	4.4	0.116667	0.0727778	0.229689	0.966667	3.4375	0	3.39864	0.916667	0.879563	4.58648	7.575	5.2125	0.55	1.29464	0.127273	0.0827431	0.0500796	0.127613	0.659472	0
IRIS_313-8027	ANSEATICO	Geng	GJ-adm	5.37169	0.622222	0.277037	0.836645	1.22083	2.97083	0	4.14048	0.911111	0.646772	3.30149	8.72083	5.10417	0	1.29736	0.682927	0.428338	0.253414	0.13999	0.582041	0
IRIS_313-8029	GRITNA	Geng	GJ-adm	4.26667	0.533333	0.384246	1.62771	2.18929	4.225	0	3.67595	0.916667	0.79623	4.18285	7.55	5.2375	0.35	1.1607	0.581818	0.482582	0.38914	0.289972	0.806683	0.142857
IRIS_313-8032	PIEMONTE	Geng	GJ-tmp	4.30556	0.766667	0.548135	1.67959	1.84583	3.0625	0.2	3.18502	0.833333	0.862103	4.41282	8.87083	5.0875	0.7	1.35181	0.92	0.635811	0.380616	0.208079	0.601966	0.285714
IRIS_313-8033	LOMELLINO	Geng	GJ-tmp	4.42255	0.9	0.618294	2.27421	1.50833	3.68333	0.15	3.05	1	1.07619	5.79009	6.92917	5.38333	0.95	1.45002	0.9	0.574521	0.392776	0.217679	0.684211	0.22807
IRIS_313-8039	LOTO	Geng	GJ-tmp	3.84308	0.916667	0.772341	2.61025	1.925	3.41667	0.25	3.05185	0.966667	1.03976	5.47889	9.89583	5.27083	0.916667	1.25926	0.948276	0.742806	0.476419	0.194526	0.648221	0.472727
IRIS_313-8048	RONCOLO	Geng	GJ-adm	5.60396	0.566667	0.222063	0.816122	1.5625	3.65	0	3.78665	0.816667	0.682778	3.41265	9.375	5.0125	0.2	1.47993	0.693878	0.325235	0.239146	0.166667	0.72818	0
IRIS_313-8049	LORD	Geng	GJ-adm	4.21753	0.833333	0.624048	2.5838	2.25	4.07917	0.05	3.2461	0.95	0.961825	5.17294	8.94167	5.375	0.733333	1.29926	0.877193	0.648816	0.499484	0.251631	0.758915	0.318182
IRIS_313-8050	MIARA	Geng	GJ-tmp	3.71534	0.633333	0.549365	1.9155	1.59167	3.4625	0.25	3.03333	1	1.08175	4.53374	7.9	4.19167	0.966667	1.22484	0.633333	0.50785	0.422499	0.201477	0.826044	0.310345
IRIS_313-8052	SMERALDO	Geng	GJ-tmp	5.09476	0.733333	0.380595	1.4688	1.58333	3.83333	0	4.10819	0.916667	0.678452	3.35569	8.51667	4.94167	0.0666667	1.24015	0.8	0.560976	0.437704	0.18591	0.775717	0
IRIS_313-8053	RUBIDIO	Geng	GJ-adm	5.57937	0.533333	0.211746	0.769974	1.55833	3.57917	0	3.55054	0.833333	0.757937	3.47517	7.95	4.5875	0.4	1.57141	0.64	0.279372	0.221565	0.196017	0.7802	0
IRIS_313-8066	GHIBLI	Geng	GJ-tmp	4.18333	1	0.744246	3.06649	1.9125	4.1125	0.3	3.37456	0.983333	0.95381	5.10001	10.1833	5.34583	0.633333	1.23967	1.01695	0.780288	0.601272	0.187807	0.769291	0.421053
IRIS_313-8095	SHSS 53	Geng	GJ-tmp	4.36152	0.833333	0.56127	1.92537	2.37917	3.43333	0	3.75456	0.9	0.757183	3.86956	11.0833	5.10833	0.233333	1.16166	0.925926	0.741261	0.497568	0.214662	0.672104	0
IRIS_313-8096	SR 113	Geng	GJ-tmp	5.34392	0.733333	0.354021	1.14778	1.45	3.20833	0	4.02222	0.955556	0.717566	3.66465	7.55833	5.11667	0.111111	1.3286	0.767442	0.493364	0.313203	0.191841	0.627036	0
IRIS_313-8099	FLIPPER	Geng	GJ-tmp	4.38148	0.416667	0.279802	0.567866	1.20179	2.05833	0	3.60556	0.966667	0.861984	3.86053	7.275	4.47917	0.383333	1.2152	0.431034	0.324602	0.147095	0.165194	0.459535	0
IRIS_313-8114	FAISCA	Geng	GJ-tmp	4.83333	0.25	0.129881	0.442868	0.95	3.6	0	3.35	1	0.97619	5.0951	9.30833	5.21667	0.65	1.44279	0.25	0.133049	0.0869204	0.102059	0.690096	0
IRIS_313-8116	HAREM	Geng	GJ-adm	4.94597	0.916667	0.494841	2.36839	1.55833	4.80417	0	3.15996	0.916667	0.951786	6.44218	9.875	6.76667	0.766667	1.5652	1	0.519908	0.367638	0.157806	0.709975	0.0434783
IRIS_313-8118	IBO 400	Geng	GJ-tmp	3.3839	0.883333	0.857024	3.97451	3.9875	4.63333	0.35	3.23426	0.9	0.911349	5.13964	10.8875	5.65417	0.683333	1.04627	0.981481	0.94039	0.773305	0.366246	0.819455	0.853659
IRIS_313-8124	OTA	Geng	GJ-adm	3.9325	0.8	0.65623	2.60192	1.575	3.97083	0.2	3.39434	0.883333	0.84869	4.42053	9.55536	5.20833	0.533333	1.15855	0.90566	0.773227	0.5886	0.164829	0.7624	0.53125
IRIS_313-8125	PLOVDIV 22	Geng	GJ-tmp	3.67779	0.9	0.805238	3.08293	2.75417	3.82917	0.4	3.27361	0.866667	0.869365	4.15473	8.77083	4.77917	0.633333	1.12347	1.03846	0.926237	0.742027	0.314014	0.801221	0.868421
IRIS_313-8126	PLOVDIV 24	Geng	GJ-tmp	4.63127	0.816667	0.492778	1.15827	1.75417	2.35	0	4.13399	0.883333	0.649524	3.15061	7.7625	4.85417	0.0833333	1.12029	0.924528	0.758675	0.367633	0.22598	0.48412	0
IRIS_313-8128	PRECOZ 2 F A	Geng	GJ-tmp	4.93333	0.75	0.40881	2.11436	1.52083	5.17083	0	3.4963	0.966667	0.896706	5.4161	8.25	6.0375	0.5	1.41102	0.775862	0.455901	0.390385	0.184343	0.856453	0
IRIS_313-8138	SALOIO	Geng	GJ-tmp	4.63518	0.766667	0.468968	1.75178	1.65833	3.73333	0	3.55789	0.983333	0.89131	4.61966	8.87083	5.18333	0.433333	1.30279	0.779661	0.526156	0.379202	0.186942	0.720257	0
IRIS_313-8139	SANDOCA	Geng	GJ-adm	4.87974	0.8	0.442619	2.09177	2.07083	4.72083	0	4.12888	0.9	0.658849	4.16642	8.9375	6.32083	0.0333333	1.18185	0.888889	0.671806	0.502054	0.231702	0.746869	0
IRIS_313-8140	SANGHAI	Geng	GJ-tmp	5.39153	0.583333	0.255556	0.837657	1.3625	3.27917	0	4.0787	0.833333	0.61627	2.99744	9.50833	4.875	0	1.32187	0.7	0.414681	0.279458	0.143295	0.67265	0
IRIS_313-8141	SELN 244 A 6-20	Geng	GJ-tmp	4.61568	0.6	0.373492	1.18188	1.1625	3.16667	0	4.02222	1	0.742063	3.22713	8.50417	4.35417	0	1.14754	0.6	0.503316	0.366233	0.136698	0.727273	0
IRIS_313-8151	VALTEJO	Geng	GJ-tmp	4.48971	0.616667	0.398929	2.5122	2.16875	4.0125	0	3.93158	0.983333	0.769087	4.28965	6.16667	5.57917	0.0666667	1.14196	0.627119	0.518704	0.585641	0.351689	0.719193	0.25
IRIS_313-8155	KULON	Geng	GJ-adm	3.99381	0.883333	0.702024	2.9458	2.6875	4.2	0.35	3.13922	0.9	0.940516	5.08038	9.28333	5.40833	0.783333	1.27223	0.981481	0.746424	0.579837	0.289497	0.776579	0.425532
IRIS_313-8158	CT 23	Geng	GJ-adm	4.65	0.183333	0.104246	0.330007	0.954167	3.17083	0	3.65614	0.966667	0.846706	4.34719	6.94167	5.1375	0.35	1.27183	0.189655	0.123119	0.0759127	0.137455	0.617194	0
IRIS_313-8162	RPC 12	Geng	GJ-tmp	5.82323	0.533333	0.186746	0.573438	0.904167	3.05833	0	3.87037	0.9	0.723849	3.29817	8.29167	4.55417	0.1	1.50457	0.592593	0.25799	0.173866	0.109045	0.671546	0
IRIS_313-8195	LUXOR	Geng	GJ-adm	4.63492	0.666667	0.411349	1.48038	1.8631	3.5875	0	3.10624	0.933333	0.986667	4.52876	9.04583	4.59167	0.833333	1.49213	0.714286	0.416908	0.326884	0.205962	0.781307	0.06
IRIS_313-8200	OPALE	Geng	GJ-tmp	3.73252	0.8	0.695397	2.16468	1.66667	3.11667	0.45	3.05263	0.95	1.02155	4.85922	8.71667	4.7625	0.9	1.22272	0.842105	0.680729	0.445479	0.191205	0.654418	0.425926
IRIS_313-8204	S 102	Geng	GJ-tmp	5.23529	0.3	0.190357	0.568937	0.66875	2.45833	0	3.58869	0.933333	0.839444	3.31062	7.4125	3.94167	0.416667	1.45883	0.321429	0.226766	0.171852	0.0902192	0.623679	0
IRIS_313-8213	GRAAL	Geng	GJ-trp	4.78788	0.283333	0.173532	0.907393	1.12917	3.57083	0	3.46053	0.983333	0.927421	4.65536	6.77917	5.025	0.475	1.38357	0.288136	0.187112	0.194914	0.166564	0.710614	0
IRIS_313-8214	MELAS	Geng	GJ-adm	3.9881	0.216667	0.152063	0.506385	1.23798	3.21667	0	3.12193	0.966667	1.01893	4.50449	9.05417	4.42083	0.866667	1.27745	0.224138	0.149239	0.112418	0.13673	0.727615	0.0576923
IRIS_313-8215	MERLE	Xian	XI-adm	3.30509	0.9	0.899683	3.90827	2.3	4.3625	0.65	3.03333	1	1.08175	5.82391	5.98333	5.38333	0.966667	1.08959	0.9	0.831695	0.671073	0.384401	0.810372	0.706897
IRIS_313-8253	KHAO DAWK MALI 105	Xian	XI-3	6	0.0333333	0.0103175	0.0335317	0.595833	2.575	0	3.68333	1	0.865079	4.58381	3.75833	5.3	0.316667	1.62896	0.0333333	0.0119266	0.00731526	0.158537	0.485849	0
IRIS_313-8332	ARC 15091	Xian	XI-adm	3.38889	0.933333	0.900556	5.2957	4.525	5.8875	0.75	3.06667	1	1.07063	7.06894	7.77917	6.60417	0.933333	1.10507	0.933333	0.841142	0.749151	0.581682	0.891483	0.642857
IRIS_313-8383	GENE	Xian	XI-adm	3.56863	0.85	0.767817	3.74974	1.75	4.88333	0.35	3.4386	0.95	0.902103	6.14485	5.86667	6.8125	0.566667	1.03782	0.894737	0.851142	0.610225	0.298295	0.71682	0.647059
IRIS_313-8493	MELABOH	Xian	XI-3	4.72121	0.533333	0.310913	0.96344	1.64583	3.075	0	4	0.933333	0.708889	2.79083	6.38889	3.94722	0	1.1803	0.571429	0.438592	0.345217	0.257609	0.779029	0
IRIS_313-8565	YAHNG LEU	Geng	GJ-sbtrp	4.28373	0.7	0.494167	2.63326	1.98631	5.3375	0.1	3.88545	0.916667	0.750952	5.26848	10.4083	7.04167	0.266667	1.10251	0.763636	0.658053	0.499813	0.190838	0.757988	0.375
IRIS_313-8631	DUDRE	Xian	XI-2	3.4	0.666667	0.64246	4.65347	1.975	4.75417	0.8	3.55504	0.916667	0.879841	5.61238	5.30833	6.37917	0.733333	0.956388	0.727273	0.7302	0.829143	0.372057	0.745265	0.590909
IRIS_313-8660	KOTTEYARAN	Xian	XI-2	3.94118	0.566667	0.44873	3.10682	1.83125	4.6125	0.1	4.52593	0.966667	0.636984	5.69193	4.40238	6.87083	0.0666667	0.8708	0.586207	0.704461	0.545828	0.415968	0.671316	1.5
IRIS_313-8815	JANA (NAM)	Geng	GJ-sbtrp	4.4178	0.783333	0.524405	2.32965	1.34167	4.44167	0.05	3.5	1	0.938413	5.42107	5.87083	5.775	0.616667	1.26223	0.783333	0.558821	0.42974	0.228531	0.76912	0.0810811
IRIS_313-8856	S 201	Geng	GJ-tmp	4.80808	0.616667	0.351706	0.917676	1.43333	2.60833	0	3.7963	0.9	0.755238	3.15294	8.27083	4.17083	0.3	1.26652	0.685185	0.465689	0.291054	0.1733	0.625375	0
IRIS_313-8857	KAMNAM	Geng	GJ-sbtrp	3.5873	0.6	0.545437	2.25886	1.51548	4.15179	0.4	3.46118	0.916667	0.87373	4.67646	3.87361	5.3375	0.65	1.03644	0.654545	0.624262	0.483028	0.391231	0.777852	0.487179
IRIS_313-8889	LU MAO ZHAN	Xian	XI-adm	3.16667	1	1.04008	5.58751	3.70833	5.375	0.9	3	1	1.09286	7.17946	8.5	6.56944	1	1.05556	1	0.951707	0.778263	0.436275	0.818182	0.866667
IRIS_313-8914	E 2040	Xian	XI-adm	3.57179	0.733333	0.676429	2.55411	1.25179	3.7875	0.5	4.01481	0.866667	0.881964	5.03278	6.01929	5.35798	0.333333	0.889654	0.846154	0.766957	0.507496	0.207963	0.70689	1.45
IRIS_313-8948	BUCAYAB	Xian	XI-3	4.12821	0.383333	0.270317	0.982835	1.0375	3.5875	0	4.03421	0.983333	0.738532	3.96311	6.975	5.3625	0	1.0233	0.389831	0.36602	0.247996	0.148746	0.668998	0
IRIS_313-8999	ARC 11430 B	Geng	GJ-sbtrp	5.83333	0.3	0.10619	0.602213	0.98125	3.47917	0	4.01754	0.983333	0.751865	4.177	11.6625	5.54583	0.0833333	1.45197	0.305085	0.141236	0.144174	0.0841372	0.627348	0
IRIS_313-9020	LEUANG CHAIYAPHUM	Xian	XI-3	4.16035	0.833333	0.599603	2.47535	2.2	4.1375	0	4.01667	0.983333	0.742698	3.87381	7.41905	5.2125	0	1.03577	0.847458	0.807331	0.638995	0.296534	0.793765	0
IRIS_313-9039	MUTTU SAMBA	Xian	XI-2	4.75	0.2	0.118849	0.396659	0.402976	2.67917	0	4.10294	0.95	0.696548	3.53768	3.825	5.07976	0	1.15771	0.210526	0.170626	0.112124	0.105353	0.52742	0
IRIS_313-9062	MAE MAI LUD NI	Xian	XI-3	3.90479	0.833333	0.668492	3.24418	1.60417	4.85417	0.1	4.06053	0.95	0.758492	4.41335	3.76944	5.76389	0.383333	0.961647	0.877193	0.881344	0.735083	0.425571	0.842169	0.434783
IRIS_313-9081	TAKAO MOCHI	Geng	GJ-tmp	3.73909	0.483333	0.405992	1.34888	1.10417	3.45417	0.15	3.55556	0.966667	0.881429	4.58262	8.38333	5.19583	0.466667	1.05162	0.5	0.460607	0.294346	0.13171	0.664796	0.25
IRIS_313-9111	XIA ZHI BAI	Xian	XI-1A	3.43649	0.916667	0.868452	4.27633	2.46667	4.92083	0.55	3.15263	0.966667	1.01004	5.71782	4.86667	5.6625	0.85	1.09004	0.948276	0.85982	0.747895	0.506849	0.869021	0.607843
IRIS_313-9114	LEUANG 28-1-87	Xian	XI-adm	3.75877	0.966667	0.833929	4.87919	4.21667	5.85	0.35	4.19035	0.966667	0.752817	4.68885	3.87083	6.22083	0.55	0.897006	1	1.10774	1.04059	1.08934	0.940388	0.787879
IRIS_313-9119	LEUANG YAI 29-12-46	Xian	XI-3	3.88453	0.883333	0.715357	3.42495	3.15417	4.79167	0.2	4.49706	0.816667	0.652143	3.24637	3.75583	5.77083	0.3	0.863794	1.08163	1.09693	1.05501	0.839805	0.830325	0.777778
IRIS_313-9121	KHAO LEUANG RAI	Xian	XI-2	3.80482	0.9	0.750516	3.3966	2.75	4.525	0.4	3.92193	0.966667	0.813373	4.60954	3.52083	5.7	0.6	0.970141	0.931034	0.92272	0.736863	0.781065	0.79386	0.472222
IRIS_313-9243	MACAN BINUNDOK	Xian	XI-adm	3.8125	0.333333	0.293175	2.49267	1.09375	5.49167	0.45	3.15	1	1.04702	7.62497	7.2	7.28333	0.9	1.21032	0.333333	0.280008	0.326908	0.15191	0.754005	0.222222
IRIS_313-9281	KHAO KAI	Xian	XI-3	3.51569	0.95	0.877103	3.76029	2.68333	4.28333	0.3	3.88333	1	0.84119	3.80082	4.75625	6.33125	0.55	0.905327	0.95	1.04269	0.989335	0.56417	0.676538	0.848485
IRIS_313-9357	HAM 48	Xian	XI-3	4.19444	0.833333	0.59127	2.56276	1.53333	4.32917	0	3.91228	0.966667	0.764762	4.45104	6.99167	5.82083	0.116667	1.07212	0.862069	0.773142	0.575766	0.219309	0.743737	0
IRIS_313-9384	BARIK KUDI	Xian	XI-2	3.96429	0.383333	0.308651	2.29898	1.49643	4.44167	0.15	3.53596	0.966667	0.896151	6.1775	5.92917	6.89167	0.583333	1.12113	0.396552	0.344418	0.372153	0.252384	0.644498	0.257143
IRIS_313-9424	ARC 5840	Xian	XI-adm	3.73529	0.316667	0.0379762	1.96893	0.425	4.2875	0	4.19917	0.916667	0.971548	5.51478	2.68583	5.60333	0.55	0.889531	0.345455	0.0390883	0.357027	0.158238	0.76517	0.424242
IRIS_313-9438	7507-137	Geng	GJ-tmp	4.6875	0.8	0.493452	1.85138	1.49881	3.74167	0.1	3.61416	0.833333	0.738492	3.87856	8.02083	5.27083	0.316667	1.29698	0.96	0.668189	0.477335	0.186865	0.709881	0.263158
IRIS_313-9463	CI 1600	Geng	GJ-tmp	5.88095	0.7	0.233889	0.677576	1.04583	2.8875	0	5.13889	0.85	0.42254	1.54654	4.73095	3.67222	0.0166667	1.1444	0.823529	0.553531	0.438125	0.221062	0.786309	0
IRIS_313-9470	SAHULO FACHE SOYO	Geng	GJ-trp	4.33788	0.4	0.27131	0.857548	1.00476	3.14583	0	4.19167	0.933333	0.665556	3.05077	10.7458	4.58333	0	1.03488	0.428571	0.407644	0.281092	0.0935025	0.686364	0
IRIS_313-9529	DAGPA BARA	Geng	GJ-sbtrp	5.2381	0.483333	0.22627	0.869426	1.2	3.8375	0	4.91837	0.883333	0.494246	3.45221	5.3225	5.35917	0	1.06501	0.54717	0.457808	0.251846	0.225458	0.716063	0
IRIS_313-9533	DUD KUNING	Xian	XI-3	3.46161	0.933333	0.893889	5.21042	2.84167	5.79583	0.5	3.93879	0.95	0.888452	5.42069	6.81167	6.85333	0.433333	0.878851	0.982456	1.00612	0.96121	0.417176	0.845696	1.21154
IRIS_313-9593	ARC 15088	Xian	XI-adm	4.44872	0.533333	0.422579	2.63316	1.65625	4.25	0.45	4.3	0.966667	0.878274	4.32239	5.19405	6.02083	0.35	1.03459	0.551724	0.481148	0.60919	0.318875	0.705882	0.666667
IRIS_313-9634	ARC 15873	Xian	XI-adm	3.60351	0.666667	0.639683	5.0099	2.9625	5.12917	0.75	4.26667	0.933333	0.7	4.06564	3.57639	5.70833	0.7	0.844572	0.714286	0.913832	1.23225	0.82835	0.89854	0.642857
IRIS_313-9709	MAKALIOKA	Xian	XI-2	3.30931	0.883333	0.880913	4.67247	2.125	5.30417	0.8	3	0.983333	1.07464	6.68428	6.20167	6.22333	0.983333	1.1031	0.898305	0.819726	0.699024	0.34265	0.852303	0.711864
IRIS_313-9769	MURASAHITSUTSURI	Geng	GJ-tmp	4.30741	0.966667	0.664484	2.35858	2.575	3.5375	0.1	4.10088	0.983333	0.729643	3.21917	7.97083	4.4125	0.0833333	1.05036	0.983051	0.910698	0.732666	0.323053	0.8017	0.4
IRIS_313-9811	KOPANCSI KEREK	Geng	GJ-tmp	5.64365	0.85	0.329484	1.36788	1.53095	4.14167	0	3.43808	0.9	0.851627	5.00517	5.875	5.87917	0.516667	1.64151	0.944444	0.386888	0.273293	0.260588	0.704465	0.0322581
IRIS_313-9813	SZANISZLO 2	Geng	GJ-tmp	4.01961	0.916667	0.699008	3.41163	2.05	4.8625	0.05	3.83824	0.95	0.774325	4.55289	8.59881	5.87063	0.183333	1.04725	0.964912	0.902732	0.749333	0.238405	0.828275	0.454545
IRIS_313-9838	TEPUKE	Geng	GJ-tmp	4.57778	0.716667	0.463492	1.7141	1.225	3.69167	0.15	3.69407	0.933333	0.811667	4.04267	9.18333	4.97917	0.383333	1.23922	0.767857	0.571037	0.424001	0.133394	0.741423	0.391304
IRIS_313-9880	PI 282203	Geng	GJ-tmp	5.18954	0.883333	0.444524	2.07901	1.54167	4.68333	0.15	3.31481	0.9	0.890516	5.36421	8.84167	6.0125	0.725	1.56556	0.981481	0.499176	0.387572	0.174364	0.778933	0.183908
IRIS_313-9884	FUKUSHIMA MOCHI (GLUT)	Geng	GJ-tmp	6.04762	0.366667	0.114325	0.409066	0.945833	3.58333	0	4.72037	0.95	0.552381	2.4912	5.48333	4.49643	0	1.28117	0.385965	0.206968	0.164204	0.172492	0.796929	0
IRIS_313-9886	HUK ZO	Geng	GJ-tmp	5	0.05	0.0263095	0.0796205	0.703571	2.9875	0	3	0.9	0.983571	4.60639	4.49583	4.68333	0.9	1.66667	0.0555556	0.026749	0.0172848	0.156494	0.6379	0
IRIS_313-9891	YONG AN HUK	Geng	GJ-tmp	4.71647	0.75	0.455198	1.62517	1.575	3.57917	0.1	3.25	0.8	0.813175	4.51177	12.8208	5.54583	0.666667	1.45122	0.9375	0.559779	0.360208	0.122847	0.645379	0.15
IRIS_313-9964	WIR 1951	Geng	GJ-tmp	3.21667	1	1.02341	5.65248	2.75	5.52083	0.85	3.05	1	1.07619	6.65086	9.32167	6.18	0.95	1.05464	1	0.950959	0.849887	0.295012	0.893339	0.859649
IRIS_313-9989	MELEKE	Xian	XI-3	3.64488	0.916667	0.80873	4.22027	1.8875	5.225	0.2	3.18333	1	1.03175	6.98865	5.7375	6.77083	0.816667	1.14499	0.916667	0.783846	0.603875	0.328976	0.771692	0.428571
IRIS_313-10010	LALKA (LAL DHAN)	Xian	XI-2	3.15705	0.416667	0.433135	2.91661	1.375	4.375	0.5	3.16667	1	1.04008	6.4227	6.29167	6.175	0.866667	0.996964	0.416667	0.416444	0.454109	0.218543	0.708502	0.403846
IRIS_313-10020	HODARAWALA	Aus	cA (Aus)	4.53377	0.816667	0.520278	2.37681	1.5375	4.55417	0	4.05	1	0.747857	3.93141	7.49583	5.25833	0	1.11945	0.816667	0.695691	0.604568	0.205114	0.866086	0
IRIS_313-10035	RIZ TYPE SORGHO	Xian	XI-2	3.50549	0.666667	0.621627	2.64563	1.59583	4.27381	0.25	3.67544	0.916667	0.804008	4.61907	8.13333	5.74583	0.383333	0.953762	0.727273	0.77316	0.572762	0.196209	0.74381	1
IRIS_313-10057	CHUGOKU 68 HEN	Geng	GJ-tmp	5.38358	0.816667	0.362222	1.14511	1.3	3.1625	0.05	4.11574	0.9	0.804881	3.11655	5.74167	4.5881	0.166667	1.30805	0.907407	0.450032	0.367429	0.226415	0.689284	0.2
IRIS_313-10084	SENIA	Geng	GJ-tmp	4.34559	0.566667	0.370119	1.12594	1.76667	3.17083	0	3.83591	0.916667	0.753175	3.26992	7.84167	4.34167	0.233333	1.13287	0.618182	0.491412	0.344332	0.225292	0.730326	0.214286
IRIS_313-10089	KALIN	Geng	GJ-tmp	4.14491	0.816667	0.606944	2.42335	1.78333	3.9875	0.15	3.42221	0.866667	0.82631	3.70211	5.40119	4.49385	0.516667	1.21118	0.942308	0.734524	0.654585	0.330174	0.887324	0.290323
IRIS_313-10096	JOKJEBICHAL	Geng	GJ-adm	4.77633	0.666667	0.387183	1.24632	2.00417	3.2125	0	5.55637	0.833333	0.343492	1.23519	3.7006	3.57917	0.0666667	0.859614	0.8	1.1272	1.00901	0.54158	0.897555	0
IRIS_313-10111	MOLO	Geng	GJ-adm	4.94118	0.716667	0.387659	1.42191	1.87917	3.67083	0	3.61111	0.9	0.809405	3.66571	9.6625	4.525	0.45	1.36833	0.796296	0.478943	0.387894	0.19448	0.811234	0
IRIS_313-10119	GITANO	Geng	GJ-adm	5.4	0.333333	0.14623	0.518062	1.39583	3.55833	0.05	3.91579	0.983333	0.776032	3.87901	8.94107	5.00417	0.05	1.37903	0.338983	0.188433	0.133555	0.156115	0.711074	0.333333
IRIS_313-10168	MEI FENG 9	Xian	XI-adm	3.77516	0.816667	0.708889	3.01769	2.32083	4.2625	0.2	3.25526	0.983333	1.00714	5.31824	3.1	5.2875	0.883333	1.15971	0.830508	0.703861	0.567423	0.748656	0.806147	0.490566
IRIS_313-10171	YA NONG ZAO 4	Xian	XI-1A	3.46065	0.866667	0.81381	3.15813	1.8375	3.87083	0.55	3.17573	0.95	0.984048	5.0043	8.42024	5.08869	0.8	1.08972	0.912281	0.827002	0.631084	0.218224	0.760674	0.583333
IRIS_313-10226	TONG GU HONG	Xian	XI-adm	3.18889	0.966667	0.998929	4.53113	1.89583	4.53333	0.75	3	0.983333	1.07464	6.28666	8.82917	5.8375	0.983333	1.06296	0.983051	0.929545	0.720754	0.214724	0.776588	0.830508
IRIS_313-10239	LIU XU	Xian	XI-adm	3.42456	0.983333	0.954087	4.43833	1.8	4.65	0.75	3.03333	0.95	1.0271	6.64455	5.84167	6.47917	0.916667	1.12898	1.03509	0.928911	0.667966	0.308131	0.717685	0.836364
IRIS_313-10337	B 6149 F-MR-7	Xian	XI-adm	4.00741	0.583333	0.460833	2.05662	1.575	4.46667	0.1	3.71667	1	0.864524	5.26206	6.36667	6.07917	0.4	1.07823	0.583333	0.533049	0.390839	0.247382	0.73475	0.333333
IRIS_313-10404	K 479-2-3	Xian	XI-adm	3.87	0.883333	0.72119	3.14987	1.79167	4.35833	0.15	3.67778	0.966667	0.852262	4.91882	4.9	5.75833	0.466667	1.05227	0.913793	0.846208	0.640372	0.365646	0.756874	0.5
IRIS_313-10458	P 168	Xian	XI-1A	3.19608	0.766667	0.792302	2.96692	0.971429	3.74464	0.7	3.08421	0.983333	1.04825	6.57881	3.8006	6.26905	0.916667	1.03627	0.779661	0.75583	0.450982	0.255599	0.597322	0.763636
IRIS_313-10484	PILIT (7480) SELN (CI 12007)	Xian	XI-1A	5.3373	0.6	0.300159	1.45153	0.66875	4.775	0	4.31667	1	0.698135	3.73067	1.8875	5.34583	0.133333	1.23644	0.6	0.429944	0.38908	0.354305	0.893219	0.25
IRIS_313-10503	HA GOO	Xian	XI-1A	4.20677	0.783333	0.553294	2.14753	1.82917	3.92917	0	3.86667	1	0.803968	3.67763	8.3	4.57083	0.133333	1.08796	0.783333	0.688203	0.583945	0.220382	0.859617	0
IRIS_313-10511	MACAN SAPAC	Xian	XI-3	4.40256	0.616667	0.442262	1.92209	1.43333	4.37083	0.2	3.6	1	0.904246	5.46996	2.5375	6.05417	0.516667	1.22293	0.616667	0.489095	0.35139	0.56486	0.721955	0.354839
IRIS_313-10542	BELLO	Xian	XI-2	3.98872	0.55	0.642857	2.62904	1.21875	3.71667	0.15	3.38333	1	0.965079	5.83119	6.77917	6.04583	0.616667	1.17893	0.55	0.666118	0.450857	0.179779	0.614748	0.243243
IRIS_313-10544	DONGREM	Xian	XI-2	4.14549	0.8	0.68381	2.60547	1.7625	4.39167	0	3.63333	1	0.881746	4.91708	6.34583	5.57083	0.366667	1.14096	0.8	0.775518	0.529881	0.277741	0.788332	0
IRIS_313-10561	NAN TEO 14	Xian	XI-1A	3.78472	0.5	0.27625	0.803487	1.05	2.9131	0.45	3.67632	0.983333	0.85381	3.8385	3.38333	4.49722	0.333333	1.02949	0.508475	0.32355	0.209323	0.310345	0.647754	0.7
IRIS_313-10567	AIKAWA 44	Geng	GJ-tmp	6.11111	0.216667	0.0311905	0.10535	0.7375	3.29167	0	3.92484	0.883333	0.717579	2.72978	2.725	3.80833	0.3	1.55704	0.245283	0.0434662	0.0385928	0.270642	0.864333	0
IRIS_313-10576	BAANYALOJOPOIHUN	Xian	XI-2	4.25092	0.666667	0.464683	2.3126	1.58631	4.97917	0	3.84191	0.95	0.771548	4.37475	10.0458	5.65833	0.15	1.10646	0.701754	0.602273	0.528626	0.157907	0.879971	0
IRIS_313-10577	IFUGAO RICE	Geng	GJ-trp	3.82982	0.866667	0.713254	2.22105	1.62083	3.1125	0.25	3.48421	0.883333	0.820913	3.01349	4.6375	3.69583	0.45	1.09919	0.981132	0.868855	0.737037	0.349506	0.842165	0.444444
IRIS_313-10602	DM 49	Aus	cA (Aus)	4.61324	0.325	0.198095	0.976567	1.19226	3.35833	0	4	0.966667	0.734206	3.46738	5.79583	4.725	0	1.15331	0.336207	0.269809	0.281644	0.20571	0.710758	0
IRIS_313-10603	UCP 122	Aus	cA (Aus)	4.26667	1	0.694524	3.60981	2.55417	5.2	0	3.98333	1	0.766468	4.81856	6.9	6.2875	0.0333333	1.07113	1	0.906135	0.749146	0.370169	0.827038	0
IRIS_313-10605	DV 86	Aus	cA (Aus)	4.42857	0.7	0.4575	1.87193	1.0625	4.09167	0	4	0.966667	0.734206	3.83939	8.07917	5.23333	0	1.10714	0.724138	0.623122	0.48756	0.131511	0.781847	0
IRIS_313-10609	MATHOLUWA	Xian	XI-adm	4.56944	0.416667	0.258135	0.655731	0.754167	2.52917	0	4.26667	1	0.69619	3.40488	5.1744	4.89583	0	1.07096	0.416667	0.370782	0.192586	0.145749	0.516596	0
IRIS_313-10614	HAM MOON	Xian	XI-adm	5.13889	0.15	0.294048	0.646089	0.71131	2.9875	0	4.10263	0.983333	0.721865	3.94344	8.63333	5.45833	0	1.25258	0.152542	0.407344	0.163839	0.0823911	0.547328	0
IRIS_313-10618	CHINES	Geng	GJ-tmp	4.125	0.3	0.312143	0.691009	0.516667	2.125	0	4.54656	0.866667	0.599643	1.92944	3.0625	3.07083	0.133333	0.90728	0.346154	0.520548	0.358139	0.168707	0.691995	0.125
IRIS_313-10642	SACHIKAZE	Geng	GJ-tmp	4.46624	0.666667	0.431349	2.16171	2.525	4.99583	0	4	1	0.759524	4.31346	6.3125	5.67917	0	1.11656	0.666667	0.567921	0.501153	0.4	0.879677	0
IRIS_313-10651	PHOU SAO LEUM NYANG	Xian	XI-adm	3.94055	0.916667	0.741508	3.11704	1.9625	4.2125	0.3	3.60614	0.983333	0.883254	4.31868	3.1625	4.87917	0.466667	1.09273	0.932203	0.839518	0.721757	0.620553	0.863365	0.642857
IRIS_313-10655	EA HOUM	Xian	XI-adm	3.77949	0.683333	0.576786	1.63545	1.2625	2.84583	0.2	3.79298	0.966667	0.808651	3.69986	4.4625	4.57917	0.283333	0.996442	0.706897	0.713269	0.44203	0.282913	0.621474	0.764706
IRIS_313-10662	KAHATAWEE	Xian	XI-2	3.8049	0.95	0.785437	3.67971	1.85	4.67083	0.25	3.7989	0.916667	0.771786	5.03527	2.33333	6.5125	0.333333	1.00158	1.03636	1.01769	0.730786	0.792857	0.71721	0.65
IRIS_313-10677	DEWAMINORI	Geng	GJ-tmp	4.85714	0.283333	0.156865	0.471483	0.958333	2.97083	0	4	0.866667	0.658254	2.50764	7.31806	3.82222	0	1.21429	0.326923	0.238305	0.188018	0.130955	0.777253	0
IRIS_313-10718	KARUTHA SEENATI	Aus	cA (Aus)	6.33333	0.05	0.013254	0.0383095	0.8625	2.925	0	4.91667	1	0.530357	2.30213	3.90417	4.34167	0	1.28814	0.05	0.0249906	0.0166409	0.220918	0.673704	0
IRIS_313-10725	ERNEST	Xian	XI-adm	4.1375	0.883333	0.638413	2.7704	2.45833	4.34583	0	4	0.933333	0.708889	3.51406	6.68333	4.95	0	1.03438	0.946429	0.900582	0.788376	0.36783	0.877946	0
IRIS_313-10726	POTO BALA	Xian	XI-3	4.32593	0.65	0.455913	2.01794	1.5625	4.35714	0	4	0.983333	0.746865	4.81475	7	6.44667	0	1.08148	0.661017	0.610435	0.419117	0.223214	0.675875	0
IRIS_313-10762	BANDI	Xian	XI-3	3.70926	0.966667	0.83004	3.82578	2.95	4.60833	0.3	3.33333	1	0.981746	5.40544	8.47917	5.5	0.666667	1.11278	0.966667	0.845473	0.707765	0.347912	0.837879	0.45
IRIS_313-10814	SIBORAS	Xian	XI-3	4.39259	0.466667	0.308611	1.32152	1.09345	4.275	0	4.06667	0.983333	0.730198	3.94715	6.8375	5.40417	0	1.08015	0.474576	0.42264	0.334803	0.15992	0.791056	0
IRIS_313-10847	ARC 6015	Xian	XI-adm	4.27485	0.916667	0.63373	2.73013	1.92917	4.3125	0	3.89649	0.966667	0.76754	3.94025	6.9375	5.13333	0.1	1.0971	0.948276	0.825664	0.692883	0.278078	0.840097	0
IRIS_313-10859	ARC 10939	Xian	XI-adm	4.62879	0.716667	0.433492	1.75491	1.70833	3.9875	0	3.96254	0.933333	0.725556	4.13243	8.79167	5.70833	0.1	1.16814	0.767857	0.597462	0.424669	0.194313	0.69854	0
IRIS_313-10863	ARC 11322	Xian	XI-2	4.10714	0.766667	0.564246	2.37993	2.14167	4.19583	0	3.79123	0.966667	0.807817	4.76925	7.27917	5.90417	0.35	1.08333	0.793103	0.698482	0.499014	0.294219	0.710656	0.0952381
IRIS_313-10884	ARC 12493	Geng	GJ-sbtrp	6.025	0.383333	0.126706	0.35726	1.28631	3.76667	0	4.17236	0.816667	0.614167	3.18922	3.28036	5.20952	0.216667	1.44403	0.469388	0.206306	0.112021	0.392125	0.723035	0
IRIS_313-10894	ARC 13204	Admix	admix	4.74872	0.6	0.354048	1.52543	1.78333	4.275	0	4.08004	0.9	0.676905	3.7832	5.8625	5.57917	0.1	1.16389	0.666667	0.523039	0.403211	0.304193	0.766243	0
IRIS_313-10904	KREM KRAHAM	Xian	XI-3	4.72619	0.533333	0.31619	1.45347	1.08631	4.59583	0.1	3.45789	0.983333	0.934643	5.57735	2.30417	5.96667	0.633333	1.36678	0.542373	0.338301	0.260602	0.471454	0.770251	0.184211
IRIS_313-10915	PHCAR SLA KI	Xian	XI-3	4.94613	0.516667	0.292698	1.41985	1.31667	4.84167	0.05	3.25614	0.983333	0.995476	6.49236	3.1125	6.52083	0.783333	1.51902	0.525424	0.294029	0.218696	0.423025	0.742492	0.0851064
IRIS_313-10932	CHINA 1039 MUTANT (DWARF)	Xian	XI-1A	3.16667	0.166667	0.229226	0.737113	0.791667	3.17917	0.1	3.54211	0.983333	0.898254	4.61169	7.88333	5.13333	0.466667	0.894007	0.169492	0.255191	0.159836	0.100423	0.619318	0.285714
IRIS_313-10941	SINTHA	Xian	XI-adm	4.18855	0.55	0.393571	1.43005	1.5375	3.62083	0	4.12931	0.933333	0.679722	3.17956	8.00417	4.6875	0	1.01435	0.589286	0.579018	0.449765	0.192087	0.772444	0
IRIS_313-10954	PADI GRUNDUL 1	Xian	XI-3	3.82745	0.95	0.794048	2.85687	2.04583	3.59167	0.35	3.2693	0.983333	0.985754	4.5623	6.69167	4.62917	0.716667	1.17073	0.966102	0.805523	0.626191	0.305729	0.775878	0.488372
IRIS_313-10966	HURANG ARISO LUTA	Xian	XI-adm	3.65899	0.85	0.746984	3.3197	1.29524	4.42917	0.35	3.31852	0.966667	0.960595	6.29596	2.88333	6.52083	0.825	1.1026	0.87931	0.777626	0.527274	0.449216	0.679233	0.444444
IRIS_313-10968	IH PEN SHIM MING	Xian	XI-1A	4.12121	0.566667	0.41373	1.70873	1.18889	4.125	0	3.7	1	0.859524	5.10088	10.0458	5.93333	0.3	1.11384	0.566667	0.481348	0.334986	0.118346	0.695225	0
IRIS_313-10971	BADAL	Xian	XI-2	4.07018	0.966667	0.721706	3.02423	2.82917	4.18333	0.1	3.85	1	0.815079	4.16122	6.19405	5.09167	0.1	1.05719	0.966667	0.885443	0.726765	0.456756	0.821604	0.5
IRIS_313-10978	PANI TORONG	Xian	XI-adm	4.25	0.0666667	0.0464683	0.601183	0.53125	3.775	0	4.45351	0.966667	0.643373	3.40193	2.22917	5.29167	0.116667	0.954304	0.0689655	0.072226	0.176718	0.238318	0.713386	0
IRIS_313-10982	LUDI GOCHYA	Xian	XI-2	5.13204	0.9	0.435238	1.83425	2.03333	4.22083	0	4.52895	0.983333	0.617698	3.24355	6.81667	5.25417	0	1.13316	0.915254	0.704613	0.565507	0.298289	0.803331	0
IRIS_313-10986	HALDI JAON	Xian	XI-2	4.91771	0.8	0.424286	1.63832	2.30417	3.87083	0	4.49211	0.916667	0.58373	3.0095	9.27917	5.14167	0	1.09475	0.872727	0.726852	0.544383	0.248316	0.752836	0
IRIS_313-11033	RATRIO	Admix	admix	4.77083	0.275	0.0480357	0.346693	1.25417	3.1625	0	4.83039	0.933333	0.523056	2.40783	5.66429	4.5744	0	0.98767	0.294643	0.0918367	0.143986	0.221417	0.691347	0
IRIS_313-11035	ZIRA SHAHI	Admix	admix	4.51948	0.566667	0.368175	1.15624	1.37083	3.0875	0	4	0.966667	0.734206	3.67546	4.66667	5	0	1.12987	0.586207	0.501459	0.314583	0.29375	0.6175	0
IRIS_313-11037	421	Aus	cA (Aus)	7	0.05	0.00714286	0.0143452	0.320833	2.00833	0	4.53333	1	0.63119	2.47163	5.49722	3.925	0	1.54412	0.05	0.0113165	0.00580396	0.0583628	0.511677	0
IRIS_313-11038	AI NAN TSAO 39	Xian	XI-1A	3.84739	0.733333	0.603095	2.088	1.23333	3.45833	0.25	3.32281	0.983333	0.970476	5.02795	7.25833	5.175	0.683333	1.15787	0.745763	0.621443	0.415278	0.16992	0.668277	0.341463
IRIS_313-11039	KWANG LU AI 4	Xian	XI-1A	6.05556	0.05	0.00714286	0.244851	0.583333	2.7	0	4.54298	0.95	0.592381	2.65602	6.84167	4.47917	0	1.33295	0.0526316	0.0120579	0.0921871	0.0852619	0.602791	0
IRIS_313-11044	BUKU	Geng	GJ-trp	5.10585	0.85	0.431706	1.40928	1.1006	3.27083	0	4.42037	0.933333	0.621389	2.50176	7.725	3.97917	0.0333333	1.15507	0.910714	0.694744	0.563316	0.142472	0.82199	0
IRIS_313-11045	ENGKABANG	Geng	GJ-trp	5.1627	0.45	0.221786	1.08368	1.18333	4.8375	0	4.84639	0.95	0.525714	2.11743	7.11667	3.99167	0	1.06527	0.473684	0.421875	0.511791	0.166276	1.2119	0
IRIS_313-11047	AUS 84	Aus	cA (Aus)	4.86905	0.25	0.135714	0.282759	0.803968	2.00873	0	4.98246	0.966667	0.496706	1.82256	6.66667	3.66667	0	0.977238	0.258621	0.273228	0.155144	0.120595	0.547835	0
IRIS_313-11062	BEGUNBICHI 33	Basmati	cB (Bas)	5.09695	0.866667	0.426587	1.26998	2.45417	2.97917	0	4.39776	0.95	0.64877	2.80975	7.04583	4.32917	0.266667	1.15899	0.912281	0.657533	0.451989	0.348315	0.688162	0
IRIS_313-11076	LAI NOK KHA	Xian	XI-3	4.43472	0.783333	0.54746	2.75947	1.35	5.02917	0.2	3.52456	0.95	0.877103	5.53392	2.6875	6.30833	0.516667	1.25823	0.824561	0.624169	0.498647	0.502326	0.797226	0.387097
IRIS_313-11079	PHAN PHAE	Xian	XI-3	4.82143	0.733333	0.407817	1.77087	2.45833	4.30417	0	4.27876	0.916667	0.63373	3.22346	6.125	5.07917	0	1.12683	0.8	0.643519	0.549371	0.401361	0.847416	0
IRIS_313-11089	SRAU THMOR	Xian	XI-3	4.18333	1	0.71369	3.20435	1.99167	4.4875	0	4	0.983333	0.746865	4.25017	8.55417	5.6925	0	1.04583	1.01695	0.955582	0.753935	0.23283	0.788318	0
IRIS_313-11090	KEO LAI	Xian	XI-3	4.69259	0.85	0.519206	2.22578	1.40417	4.28333	0	4.08421	0.983333	0.739643	4.08053	2.29583	5.51667	0.133333	1.14896	0.864407	0.701969	0.545463	0.611615	0.776435	0.375
IRIS_313-11095	MAK EA NAM	Xian	XI-3	4.3265	0.633333	0.446032	1.93804	1.36528	4.3375	0.1	3.74303	0.916667	0.790952	3.94354	1.80417	4.9875	0.416667	1.15588	0.690909	0.563917	0.491446	0.756736	0.869674	0.2
IRIS_313-11097	KALAGNON	Xian	XI-adm	6.37037	0.05	0.00714286	0.240893	0.595833	2.69167	0	4.10175	0.983333	0.721865	3.42611	6.89167	4.75	0	1.55308	0.0508475	0.009895	0.0703109	0.0864571	0.566667	0
IRIS_313-11113	KAL SHULI	Xian	XI-2	6.2	0.05	0.00714286	0.397788	0.23125	2.9125	0	4.51667	1	0.630357	3.28683	7.67083	5.19583	0	1.37269	0.05	0.0113314	0.121025	0.0301467	0.560545	0
IRIS_313-11126	ANBAW	Xian	XI-adm	3.72456	0.983333	0.850754	4.26744	3.14167	5.0125	0.65	3.32018	0.983333	0.97631	5.25275	6.45	5.37917	0.733333	1.1218	1	0.871398	0.81242	0.48708	0.931836	0.568182
IRIS_313-11137	NGALONGYI	Xian	XI-adm	3.30526	0.983333	0.976032	5.14149	2.425	5.26429	0.8	3.03333	1	1.08313	7.47843	5.8375	6.90417	0.983333	1.08965	0.983333	0.901117	0.687509	0.415418	0.76248	0.711864
IRIS_313-11144	TAUNGDI	Xian	XI-adm	4.1	0.383333	0.391786	1.3635	1.0875	4.38333	0.3	3.55	1	0.925357	5.07867	2.34167	5.49167	0.6	1.15493	0.383333	0.423389	0.268475	0.464413	0.798179	0.277778
IRIS_313-11151	E 21	Xian	XI-3	4.05055	0.583333	0.454167	2.14911	1.55417	4.74167	0.1	3.36053	0.966667	0.941151	6.03243	5.32083	6.40833	0.633333	1.20533	0.603448	0.482565	0.356259	0.292091	0.739922	0.131579
IRIS_313-11191	RANRUWAN	Aus	cA (Aus)	5	0.35	0.233452	0.70659	0.744444	3.03056	0	4.50568	0.916667	0.582897	2.26717	6.09722	3.89167	0	1.10971	0.381818	0.400504	0.311662	0.122096	0.778729	0
IRIS_313-11195	KHAW KAR 13	Geng	GJ-sbtrp	4.06528	0.733333	0.545317	0.838936	0.970833	1.52083	0	3.77105	0.966667	0.823373	3.36214	5.77083	4.1	0.366667	1.07802	0.758621	0.662297	0.249524	0.168231	0.370935	0
IRIS_313-11197	K 17-9-1-1	Xian	XI-adm	3.8268	0.85	0.713929	3.76758	2.5625	5.31012	0.3	3.62829	0.9	0.830238	4.82011	2.16131	5.72619	0.85	1.05471	0.944444	0.859908	0.781638	1.18562	0.927339	0.392157
IRIS_313-11205	KAZALSAIL	Xian	XI-2	6.3	0.05	0.00714286	0.345298	0.1625	2.82083	0	4.2	1	0.709524	4.3281	12.325	6.1	0	1.5	0.05	0.0100671	0.0797805	0.0131846	0.462432	0
IRIS_313-11224	PATNAI 31-679	Xian	XI-2	4.9619	0.283333	0.147698	0.621993	1.07024	4.225	0	4.18333	1	0.71369	4.39812	10.2417	6.1625	0	1.18611	0.283333	0.20695	0.141423	0.104498	0.685598	0
IRIS_313-11229	STRAW 23-428	Xian	XI-2	4.67262	0.7	0.416667	1.82311	1.80417	4.35833	0	4.13333	1	0.72619	4.48967	11.3208	6.18333	0	1.13047	0.7	0.57377	0.406067	0.159367	0.704852	0
IRIS_313-11234	LIGUNGTUNG	Xian	XI-adm	4.54167	0.525	0.335	0.622359	1.48125	2.73125	0	4.05175	0.983333	0.735198	2.96686	6.87321	4.04167	0	1.12091	0.533898	0.455659	0.20977	0.215511	0.675773	0
IRIS_313-11239	B 737 G-KN-23-1	Xian	XI-adm	4	0.0833333	0.0632937	0.1326	0.5625	2.11667	0	4.09444	0.966667	0.71754	3.15934	7.99167	4.4	0.05	0.976934	0.0862069	0.0882093	0.0419709	0.0703858	0.481061	0
IRIS_313-11240	CR 157-392-4	Xian	XI-adm	4.33464	0.816667	0.553611	2.19661	2.12083	3.95	0	4.03333	1	0.75119	3.60043	9.54583	4.79167	0	1.0747	0.816667	0.736978	0.610097	0.222174	0.824348	0
IRIS_313-11241	BR 116-3B-53	Xian	XI-2	4.73016	0.466667	0.271111	0.841787	0.891667	3.07083	0	4.50877	0.983333	0.621865	2.84624	10.2167	4.575	0	1.0491	0.474576	0.435965	0.295753	0.0872757	0.67122	0
IRIS_313-11242	OR 117-8	Xian	XI-2	4.90278	0.533333	0.284246	0.919762	1.21528	3.23333	0	4.27778	0.966667	0.66754	2.92599	6.27083	4.37917	0	1.1461	0.551724	0.425811	0.314342	0.193798	0.738344	0
IRIS_313-11245	RP 20-12	Xian	XI-adm	5	0.2	0.127381	0.313074	1.06667	3.02778	0	4.89181	0.916667	0.492063	1.92774	7.82083	3.91667	0	1.02212	0.218182	0.258871	0.162405	0.136388	0.77305	0
IRIS_313-11256	ARC 12411	Xian	XI-adm	4.11905	0.075	0.0569643	0.704864	0.933333	3.35417	0	4.06667	1	0.742857	3.88946	7.7125	5.2375	0	1.01288	0.075	0.0766827	0.181224	0.121016	0.640414	0
IRIS_313-11257	ARC 12757	Xian	XI-adm	4.63004	0.666667	0.403849	1.47813	1.84167	3.65833	0	4.47149	0.9	0.579405	2.9516	7.37917	5.10417	0	1.03546	0.740741	0.697007	0.500788	0.249577	0.716735	0
IRIS_313-11258	ARC 13502	Basmati	cB (Bas)	4.88889	0.85	0.458095	1.49526	1.65417	3.24167	0	4.33304	0.95	0.642381	2.97766	6.57917	4.6375	0	1.12828	0.894737	0.713121	0.502159	0.251425	0.699012	0
IRIS_313-11260	ARC 13591	Xian	XI-adm	4.50231	0.833333	0.530437	1.82198	1.72083	3.44167	0	4.15741	0.966667	0.696706	3.04605	7.46667	4.37917	0	1.08296	0.862069	0.761349	0.598144	0.230469	0.785918	0
IRIS_313-11263	ARC 13919	Xian	XI-adm	4.64763	0.8	0.478452	1.44575	1.45417	3.02917	0	4.03421	0.95	0.713214	3.05238	8.35833	4.275	0	1.15205	0.842105	0.67084	0.473648	0.173978	0.708577	0
IRIS_313-11266	ARC 14347	Xian	XI-adm	4.58349	0.816667	0.503611	1.92318	1.52083	3.80833	0	4.08596	0.966667	0.713373	3.81648	6.20774	5.35417	0	1.12176	0.844828	0.705958	0.503914	0.24499	0.711284	0
IRIS_313-11267	ARC 14358	Xian	XI-2	4.42381	0.566667	0.367897	1.32149	1.18333	3.59167	0	3.95238	0.8	0.61873	3.20015	4.9125	5.16667	0.0333333	1.11928	0.708333	0.5946	0.412946	0.240882	0.695161	0
IRIS_313-11269	ARC 14632	Xian	XI-adm	4.01667	0.95	0.717381	3.64144	1.9375	5.08333	0	3.81404	0.983333	0.807976	4.85036	8.375	6	0.183333	1.05313	0.966102	0.887874	0.750756	0.231343	0.847222	0
IRIS_313-11270	ARC 14663	Basmati	cB (Bas)	4.68824	0.95	0.562103	2.48626	2.42917	4.41667	0	4.25	1	0.71119	3.60255	4.22917	5.0625	0.15	1.10311	0.95	0.790369	0.690139	0.574384	0.872428	0
IRIS_313-11273	ARC 14860	Xian	XI-adm	4.17328	0.733333	0.524484	2.17942	1.49167	4.1625	0	3.91667	1	0.787302	4.01625	9.84583	5.10417	0.0833333	1.06552	0.733333	0.666179	0.542651	0.151502	0.81551	0
IRIS_313-11279	ARC 15455	Xian	XI-adm	3.92157	0.85	0.675595	2.95416	1.48333	4.375	0.15	3.4	1	0.959524	5.71708	6.45833	5.95	0.5	1.1534	0.85	0.704094	0.516725	0.229677	0.735294	0.3
IRIS_313-11287	ARC 18371	Xian	XI-adm	3.51703	0.883333	0.822579	3.7429	1.7125	4.55	0.65	3.16667	1	1.0373	5.07345	3.35833	4.88333	0.833333	1.11064	0.883333	0.792999	0.737742	0.509926	0.931741	0.6
IRIS_313-11289	ARC 18578	Basmati	cB (Bas)	4.08684	0.966667	0.714206	3.33611	2.64167	4.67917	0	4	0.983333	0.746865	3.87146	4.93333	5.17778	0	1.02171	0.983051	0.956272	0.861717	0.535473	0.903702	0
IRIS_313-11299	ARC 14299	Xian	XI-adm	4.1866	0.8	0.575952	3.08876	2.1375	5.36667	0	3.74455	0.916667	0.775397	4.66766	4.575	6.01667	0.25	1.11805	0.872727	0.742784	0.661737	0.467213	0.891967	0.2
IRIS_313-11303	ARC 15097	Xian	XI-adm	4.98684	0.966667	0.579762	2.54515	1.53333	4.39167	0.45	3.53704	0.966667	0.908651	4.81404	2.92917	5.29583	0.75	1.40989	1	0.638047	0.528693	0.523471	0.829268	0.511111
IRIS_313-11309	ARC 15862	Xian	XI-adm	5.44427	0.833333	0.395992	2.27889	1.5125	5.74167	0.1	3.60088	0.983333	0.904365	6.11217	2.81667	6.76667	0.65	1.51193	0.847458	0.437867	0.372844	0.536982	0.848522	0.205128
IRIS_313-11327	JAO' HAWN MAE JAN	Xian	XI-3	4.31845	0.516667	0.342421	1.51419	1.2875	4.38333	0	3.39535	0.883333	0.852302	5.30482	2.59167	6.23333	0.566667	1.27187	0.584906	0.40176	0.285436	0.496785	0.703209	0.0882353
IRIS_313-11338	LOBANG (WHITE)	Xian	XI-adm	4.82153	0.75	0.419643	1.7401	1.42083	4.1625	0	4.52838	0.883333	0.554246	2.73091	8.82639	4.89861	0	1.06474	0.849057	0.757142	0.637186	0.160976	0.849731	0
IRIS_313-11345	WAGWAG	Xian	XI-adm	5.12222	0.7	0.348333	0.949677	1.47083	2.70417	0	4.18129	0.916667	0.654563	3.0763	9.52917	4.69917	0	1.22503	0.763636	0.532161	0.308707	0.154351	0.575457	0
IRIS_313-11347	WAGWAG RAOIS	Xian	XI-adm	4.52222	0.216667	0.14373	0.819952	0.8125	4.3	0	3.96579	0.983333	0.759365	4.53148	2.99583	5.97083	0.05	1.14031	0.220339	0.189277	0.180946	0.27121	0.720167	0
IRIS_313-11372	SUFALDHULA	Xian	XI-2	4.6127	0.433333	0.26246	1.07609	1.225	4.09167	0	4	0.966667	0.734206	3.92927	8.5125	5.34167	0	1.15317	0.448276	0.357475	0.273864	0.143906	0.765991	0
IRIS_313-11394	INDO NO 13030	Xian	XI-adm	5.66667	0.25	0.127381	0.280947	0.755159	3.07083	0	4.84737	0.983333	0.538532	2.29171	6.5	4.25417	0	1.16902	0.254237	0.236534	0.122593	0.116178	0.721841	0
IRIS_313-11406	A 28-6	Xian	XI-3	4.65417	0.933333	0.566111	2.57708	1.2	4.54583	0	3.87778	0.966667	0.773095	4.68674	2.97917	6.06667	0.116667	1.20021	0.965517	0.732266	0.549866	0.402797	0.749313	0.142857
IRIS_313-11416	KONAMANI	Xian	XI-2	4.34576	0.883333	0.598413	2.28116	1.44583	3.80833	0	4.03333	0.966667	0.725873	3.91151	7.8875	5.3875	0	1.07746	0.913793	0.824404	0.583191	0.183307	0.706883	0
IRIS_313-11446	NAPDAI	Xian	XI-2	3.53571	0.433333	0.59994	2.46289	0.883333	3.99167	0.45	3.48333	1	0.931746	4.78517	4.34381	5.13175	0.516667	1.01504	0.433333	0.643888	0.514693	0.203355	0.777838	0.483871
IRIS_313-11453	ZINYA KOLAMBA	Xian	XI-2	4.5	0.133333	0.0896032	0.342751	0.632738	3.72917	0	4	1	0.759524	4.29131	11.0542	5.65	0	1.125	0.133333	0.117973	0.079871	0.0572398	0.660029	0
IRIS_313-11460	SELHI	Xian	XI-2	4	0.966667	0.734206	3.97611	3.85	5.40833	0	3.91667	1	0.787302	5.11485	10.6405	6.49583	0.0833333	1.02128	0.966667	0.93256	0.777365	0.361826	0.832585	0
IRIS_313-11479	VANKALI	Geng	GJ-trp	4.07143	0.3	0.234246	0.892191	0.75625	3.74583	0.1	3.79649	0.983333	0.820476	4.43021	1.7875	5.39583	0.283333	1.07242	0.305085	0.2855	0.201388	0.423077	0.694208	0.235294
IRIS_313-11508	PAWNG AEW 1	Xian	XI-3	4.89183	0.816667	0.458056	1.96156	1.5625	4.27083	0.05	4.16667	1	0.733968	3.74762	2.35	5.10417	0.133333	1.17404	0.816667	0.624081	0.523415	0.664894	0.836735	0.375
IRIS_313-11516	IR 3839-1	Xian	XI-adm	4.19444	0.5	0.354762	1.12475	1.44048	3.1625	0	4.09368	0.883333	0.650913	2.74162	8.1	4.2125	0	1.02461	0.566038	0.545022	0.410249	0.177837	0.750742	0
IRIS_313-11521	TAN NONG	Xian	XI-adm	6.27778	0.383333	0.13504	0.138751	1.075	3.70417	0	4.51667	1	0.641468	2.71515	1.95	4.23333	0.0333333	1.38991	0.383333	0.210517	0.0511026	0.551282	0.875	0
IRIS_313-11522	XINTUAN HEI GU	Geng	GJ-adm	4.60317	0.716667	0.440992	1.65966	1.88333	3.76667	0	3.86111	0.866667	0.702698	3.59614	8.65833	5.12083	0.183333	1.19219	0.826923	0.627569	0.461512	0.217517	0.735557	0
IRIS_313-11528	ZO	Xian	XI-3	4.5	0.75	0.485476	1.93889	1.61012	3.94167	0	4	0.983333	0.746865	4.03924	8.375	5.40833	0	1.125	0.762712	0.650019	0.480013	0.192253	0.728814	0
IRIS_313-11576	JIANG HUI DAO	Xian	XI-adm	3.20263	0.983333	1.00798	5.60543	3.74196	5.55833	0.8	3.36754	0.966667	0.950873	6.06911	2.87321	6.3625	0.75	0.951029	1.01724	1.06005	0.923601	1.30236	0.873608	1.04444
IRIS_313-11580	TAI ZHOU XIAN	Xian	XI-adm	5.45238	0.4	0.12	0.847103	1.02083	4.4375	0.05	4.06667	0.983333	0.749643	4.07494	2.02917	5.4375	0.166667	1.34075	0.40678	0.160076	0.207881	0.50308	0.816092	0.1
IRIS_313-11582	WAN GENG BAI DAO TOU	Geng	GJ-tmp	4.61667	0.783333	0.478294	1.64995	1.70417	3.44583	0	3.96667	0.983333	0.767698	3.77087	6.74167	4.90833	0.15	1.16387	0.79661	0.623023	0.437551	0.252781	0.702037	0
IRIS_313-11595	AMAKOYALI	Aus	cA (Aus)	4.40185	0.6	0.386964	1.12549	0.976786	3.54167	0	4	0.966667	0.734206	4.11788	4.82083	5.6125	0	1.10046	0.62069	0.527051	0.273318	0.202618	0.631032	0
IRIS_313-11600	KOTODESHI	Xian	XI-2	3.26471	0.883333	0.893968	3.00662	1.94583	3.35833	0.8	3.05088	0.983333	1.05798	5.75989	4.35	5.44583	0.933333	1.07009	0.898305	0.84498	0.521992	0.447318	0.616679	0.767857
IRIS_313-11627	JADO	Basmati	cB (Bas)	5.15873	0.325	0.156845	0.325979	0.716667	1.3625	0	4.2	1	0.71119	2.14892	4.3375	3.01786	0	1.22827	0.325	0.220539	0.151694	0.165226	0.451479	0
IRIS_313-11635	GAM PERNG	Xian	XI-3	4.43666	0.4	0.25381	1.31022	1.38889	3.575	0	4.0547	0.9	0.671071	3.13176	6.67083	4.675	0	1.0942	0.444444	0.378215	0.418364	0.208203	0.764706	0
IRIS_313-11640	NCS 458	Xian	XI-2	3.27018	0.983333	0.989921	4.26543	1.95417	4.30833	0.766667	3.1	1	1.05952	5.62333	9.30417	5.30833	0.9	1.0549	0.983333	0.934307	0.758523	0.210031	0.811617	0.851852
IRIS_313-11642	NCS 599	Xian	XI-2	3.62281	0.983333	0.88131	4.31437	2.45179	4.89583	0.483333	3.18333	1	1.03175	5.59486	5.975	5.425	0.816667	1.13805	0.983333	0.854192	0.771131	0.410341	0.902458	0.591837
IRIS_313-11643	NCS 603 B	Xian	XI-1B	4.16056	0.7	0.5025	2.29777	1.41667	4.57083	0	4.06754	0.983333	0.735754	3.85028	4.64167	5.23333	0.0666667	1.02287	0.711864	0.682973	0.596779	0.305206	0.873408	0
IRIS_313-11644	NCS 745	Xian	XI-2	4.15417	0.866667	0.637976	3.01207	1.25417	4.68333	0.2	3.57807	0.983333	0.887143	5.93071	5.075	6.68333	0.433333	1.16101	0.881356	0.719136	0.507877	0.247126	0.700748	0.153846
IRIS_313-11645	NCS 766	Xian	XI-2	3.2	1	1.02619	6.17265	3.3625	6.01667	0.8	3.08333	1	1.06508	6.48642	9.12083	6.09167	0.916667	1.03784	1	0.963487	0.951627	0.368661	0.987688	0.872727
IRIS_313-11646	NCS 771 A	Xian	XI-2	3.98519	0.933333	0.717222	3.2382	2.32917	4.52083	0.05	3.93333	0.983333	0.769087	3.9199	7.57917	5.09167	0.0666667	1.01318	0.949153	0.932563	0.826094	0.307312	0.887889	0.75
IRIS_313-11648	NCS 830	Xian	XI-2	3.56667	1	0.903968	3.69789	2.2625	4.0875	0.433333	3.34415	0.95	0.927103	4.12407	8.09583	4.45	0.616667	1.06654	1.05263	0.975046	0.896659	0.279465	0.918539	0.702703
IRIS_313-11651	FEI ZHAO 12	Geng	GJ-tmp	5	0.283333	0.144365	0.390847	1.07083	2.74167	0	4.03704	0.883333	0.662579	2.39738	6.65583	3.615	0	1.23853	0.320755	0.217883	0.163031	0.160886	0.758414	0
IRIS_313-11652	GONG SHE 9	Geng	GJ-tmp	4.93333	0.233333	0.123056	0.318733	1.33472	2.60417	0	4.05556	0.916667	0.68373	3.11209	5.3	4.55833	0	1.21644	0.254545	0.179977	0.102418	0.251834	0.571298	0
IRIS_313-11655	SI WAN 14	Geng	GJ-tmp	4.49265	0.783333	0.501627	1.45344	1.83333	2.90833	0	4.18056	0.85	0.608095	2.25295	6.63667	3.72	0	1.07465	0.921569	0.824915	0.645126	0.276243	0.78181	0
IRIS_313-11656	B 3913 B 16-20 ST 28	Xian	XI-adm	5.06667	0.316667	0.159683	0.456417	1.36714	2.85	0	4.40877	0.966667	0.636429	2.6491	5.71667	4.15	0.0166667	1.14922	0.327586	0.250904	0.172292	0.23915	0.686747	0
IRIS_313-11663	MARHARORA	Admix	admix	4.33144	0.716667	0.481825	2.48801	1.89583	5.18333	0	4	1	0.759524	5.25337	6.77083	6.91667	0	1.08286	0.716667	0.634378	0.473602	0.28	0.749398	0
IRIS_313-11664	CUN GU NUO	Xian	XI-adm	4.27407	0.933333	0.649722	2.43017	2.06667	3.75417	0	4.12105	0.966667	0.70504	3.30504	5.72917	4.69167	0	1.03713	0.965517	0.92154	0.735292	0.360727	0.800178	0
IRIS_313-11665	JIN HUA 258	Xian	XI-1A	3.56944	0.9	0.834683	3.57765	1.49167	4.26667	0.6	3.18462	0.955556	0.986878	5.33271	3.43274	5.39583	0.8	1.12084	0.94186	0.845781	0.670887	0.434541	0.790734	0.708333
IRIS_313-11667	LUO AI ZAO 3	Xian	XI-1A	4.32948	0.766667	0.525635	1.85473	2.05417	3.56667	0	4.14259	0.933333	0.677222	3.23498	6.47083	4.77083	0	1.04511	0.821429	0.776163	0.573338	0.31745	0.747598	0
IRIS_313-11668	RONG DAO 4	Xian	XI-1A	3.51667	0.783333	0.736349	3.0407	1.64167	4.12083	0.516667	3.11667	1	1.05397	4.30218	7.29583	4.07917	0.883333	1.12834	0.783333	0.698645	0.70678	0.225014	1.01021	0.584906
IRIS_313-11671	DERAWA	Xian	XI-2	4.20741	0.966667	0.685595	3.5539	2.79167	5.175	0.0166667	3.96579	0.983333	0.76631	4.3437	5.81667	5.67083	0.133333	1.06093	0.983051	0.894671	0.818174	0.479943	0.912564	0.125
IRIS_313-11673	BURI BURING	Geng	GJ-trp	4.05556	0.833333	0.620437	2.20797	2.05417	3.575	0	4	0.966667	0.734206	3.40425	8.21667	4.64167	0	1.01389	0.862069	0.845044	0.648592	0.25	0.770197	0
IRIS_313-11677	E NAWN KHAO	Xian	XI-3	4.26667	0.05	0.0379762	0.243311	0.976667	3.2875	0	4.03333	1	0.75119	3.61484	6.55833	4.8125	0	1.05785	0.05	0.0505547	0.0673089	0.14892	0.683117	0
IRIS_313-11682	MA EUE	Xian	XI-3	3.22222	0.55	0.661845	1.83951	1.19861	3.34087	0.6	3.11667	1	1.05397	6.01536	6.12202	5.70476	0.883333	1.03387	0.55	0.627956	0.305802	0.195787	0.585629	0.490566
IRIS_313-11683	NIAW KHIAW NGOO	Xian	XI-3	4.42527	0.616667	0.405873	1.64453	2.04583	4.02917	0	4.10088	0.983333	0.721865	3.53661	3.71726	4.9	0	1.0791	0.627119	0.562256	0.465001	0.55036	0.822279	0
IRIS_313-11685	PLAWNG SAENG	Xian	XI-3	3.96078	0.816667	0.645556	2.94007	2.15	4.55833	0.183333	3.26667	1	1.00675	5.48995	7.42083	5.45417	0.766667	1.21248	0.816667	0.64123	0.535536	0.289725	0.835752	0.23913
IRIS_313-11689	DECHANGBYEO	Geng	GJ-tmp	4.71385	0.466667	0.271111	0.764992	1.3625	2.82917	0	4.05741	0.883333	0.658413	2.66446	8.7625	4.04167	0	1.16179	0.528302	0.411765	0.287109	0.155492	0.7	0
IRIS_313-11691	SHANGYIPA	Geng	GJ-sbtrp	4.19365	0.783333	0.55746	2.45624	2.04167	4.3994	0	4.01754	0.933333	0.704722	4.17702	7.55417	5.925	0	1.04383	0.839286	0.791036	0.588036	0.27027	0.742516	0
IRIS_313-11692	CHIAYI WU-K'O	Xian	XI-1A	4.52778	0.875	0.533333	1.39236	1.025	3.09167	0	4.11842	0.983333	0.719087	3.30837	5.64583	4.60417	0.0166667	1.0994	0.889831	0.741681	0.42086	0.18155	0.671493	0
IRIS_313-11693	CHING CH'UNG	Xian	XI-adm	4.33815	0.9	0.613016	2.62462	1.3375	4.27917	0.0333333	3.98246	0.983333	0.762143	3.98919	7.1625	5.23333	0.133333	1.08932	0.915254	0.804332	0.657932	0.186736	0.817675	0.25
IRIS_313-11700	DAW NOK KAEN	Xian	XI-3	4.92778	0.883333	0.470079	1.67322	1.97083	3.5375	0	4.44298	0.983333	0.641865	3.14799	5.325	4.90833	0	1.10911	0.898305	0.732365	0.53152	0.37011	0.720713	0
IRIS_313-11705	DAWK PUD KHAO	Xian	XI-3	4.22661	0.95	0.670437	2.89405	2.31667	4.31667	0.0166667	3.98333	0.983333	0.760754	3.76009	5.62083	4.9375	0.116667	1.06107	0.966102	0.881279	0.769676	0.412157	0.874262	0.142857
IRIS_313-11708	KHAO YAI GUANG	Xian	XI-3	5.32639	0.425	0.174048	0.860449	1.44583	3.15417	0	4	0.983333	0.746865	4.08244	5.09583	5.4625	0	1.3316	0.432203	0.233038	0.210768	0.283729	0.577422	0
IRIS_313-11716	SOSSOKA	Xian	XI-3	4.30392	0.733333	0.500317	1.81821	1.44167	3.625	0	4.03333	0.983333	0.738532	3.81312	7.84167	5.16548	0	1.06709	0.745763	0.677449	0.476831	0.183847	0.701775	0
IRIS_313-11717	JATI MANI	Xian	XI-adm	4.66667	0.225	0.284524	0.563399	1.06726	2.50833	0	4.01667	1	0.755357	3.03305	5.39167	4.01667	0	1.16183	0.225	0.376675	0.185754	0.197947	0.624481	0
IRIS_313-11720	DAW 85	Xian	XI-3	4.08683	0.783333	0.579683	2.76325	1.40417	4.7625	0	3.8	1	0.82619	4.80807	3.9625	5.8125	0.2	1.07548	0.783333	0.701633	0.574711	0.354364	0.819355	0.0833333
IRIS_313-11722	KABERI	Xian	XI-adm	4	0.8	0.607619	1.99138	2.07083	3.2375	0	3.7	1	0.859524	4.31391	6.53929	5.01369	0.3	1.08108	0.8	0.706925	0.461618	0.316676	0.645732	0
IRIS_313-11723	DISSIGBE	Xian	XI-2	4.4028	0.65	0.427024	2.05884	1.61667	4.79583	0	4.05088	0.983333	0.734365	4.41368	9.05417	6.01667	0	1.08688	0.661017	0.581487	0.466468	0.178555	0.797091	0
IRIS_313-11724	KONYAN	Xian	XI-3	4.38235	0.85	0.571845	1.35771	1.4	3.5625	0	4.01667	1	0.755357	4.35866	7.60417	5.77083	0	1.09104	0.85	0.757053	0.311496	0.18411	0.617329	0
IRIS_313-11725	ZUIHOU	Geng	GJ-tmp	4.68056	0.333333	0.196508	0.615727	1.20833	3.12083	0	4.16277	0.9	0.646071	2.77628	6.99583	4.29167	0	1.12439	0.37037	0.304158	0.221781	0.172722	0.727184	0
IRIS_313-11727	HONG YANG ZAO 3	Xian	XI-1A	4.10556	0.683333	0.502341	1.73215	1.04821	3.43333	0	3.78333	1	0.831746	3.89234	6.82917	4.67917	0.216667	1.08517	0.683333	0.60396	0.445014	0.153491	0.733749	0
IRIS_313-11728	LUO SI ZHAN	Xian	XI-3	4.72393	0.575	0.511131	1.64294	1.96667	3.80417	0	4.01667	1	0.755357	2.921	5.1375	5.76875	0	1.17608	0.575	0.676675	0.562459	0.382806	0.659444	0
IRIS_313-11729	MEI LIU ZAO 5	Xian	XI-adm	3.73016	0.25	0.263512	0.761648	0.908889	2.89222	0.05	3.60136	0.916667	0.823452	3.55777	3.87083	4.325	0.416667	1.03576	0.272727	0.320009	0.21408	0.234804	0.668722	0.12
IRIS_313-11730	QING ER XIAO 2	Xian	XI-adm	3.47427	0.766667	0.724246	2.282	1.1119	3.15417	0.533333	3.16179	0.933333	0.973611	4.2164	8.83333	4.32917	0.816667	1.09883	0.821429	0.743876	0.541219	0.125876	0.728585	0.653061
IRIS_313-11731	QING TAI AI	Xian	XI-adm	4.54603	0.683333	0.432341	1.48918	1.36667	3.45	0	3.67368	0.966667	0.851151	4.0634	9.29583	4.77917	0.433333	1.23746	0.706897	0.507949	0.366488	0.147019	0.721883	0
IRIS_313-11733	SHUANG BAI AI 2	Xian	XI-1A	4.03509	0.883333	0.662579	2.20374	1.70893	3.29167	0	4	0.966667	0.734206	3.32861	6.62083	4.53333	0	1.00877	0.913793	0.902443	0.66206	0.258114	0.726103	0
IRIS_313-11734	SI CHAO 1	Xian	XI-1A	4.37661	0.816667	0.546111	1.81855	1.55833	3.3	0	4.01667	0.95	0.717381	3.16328	8.47917	4.4125	0	1.08961	0.859649	0.761257	0.574893	0.183784	0.747875	0
IRIS_313-11737	CHUNDI	Aus	cA (Aus)	4.88636	0.733333	0.449107	1.40446	1.175	3.4375	0	4.24873	0.95	0.663214	3.11247	5.91667	4.70417	0	1.15008	0.77193	0.677167	0.451236	0.198592	0.730735	0
IRIS_313-11738	PAUNDRI	Xian	XI-2	3.41373	0.9	0.872738	2.72381	2.4125	4.5375	0.65	3.03333	1	1.08175	6.75691	7.11667	6.24583	0.966667	1.1254	0.9	0.806787	0.403114	0.338993	0.726484	0.672414
IRIS_313-11739	NAKPUI	Geng	GJ-trp	4.51745	0.775	0.414524	1.5042	3.1875	3.55833	0	4.13519	0.966667	0.700873	3.24656	6.48611	4.62778	0	1.09244	0.801724	0.591439	0.463319	0.491435	0.768908	0
IRIS_313-11740	UGAGA	Xian	XI-adm	4.28571	0.283333	0.191865	0.64124	0.8875	3.26667	0	4	1	0.759524	3.74698	7.34583	4.93333	0	1.07143	0.283333	0.252612	0.171135	0.120817	0.662162	0
IRIS_313-11741	HERATH BANDA	Xian	XI-2	4.40293	0.55	0.362738	1.32669	1.05417	3.68333	0	4.08333	1	0.73869	4.40481	4.40417	5.9625	0	1.07827	0.55	0.491056	0.301191	0.239357	0.61775	0
IRIS_313-11742	KALIBAJARI	Aus	cA (Aus)	4.11961	0.733333	0.54254	2.65978	1.20417	4.91667	0	3.46448	0.816667	0.764722	4.19998	2.55833	5.5375	0.433333	1.1891	0.897959	0.70946	0.633285	0.470684	0.887886	0.0384615
IRIS_313-11746	E 2070	Xian	XI-1A	4.27952	0.833333	0.577937	1.74461	1.39167	3.02083	0	3.8049	0.95	0.782659	3.10228	8.92917	3.97083	0.183333	1.12474	0.877193	0.738427	0.562365	0.155856	0.760756	0
IRIS_313-11747	E 4197	Xian	XI-adm	4.01754	0.95	0.717381	3.03662	2.40833	4.23333	0	3.94912	0.983333	0.763532	4.01888	9.1875	5.2625	0.05	1.01733	0.966102	0.939556	0.75559	0.262132	0.804434	0
IRIS_313-11748	GAO JIAO YING GAN ZHAN	Xian	XI-adm	3.90556	0.916667	0.725397	3.57165	1.73095	4.87917	0.1	3.45877	0.983333	0.926032	5.4914	7.93333	5.92083	0.55	1.12917	0.932203	0.783339	0.650409	0.218187	0.824068	0.181818
IRIS_313-11750	L 10595	Xian	XI-adm	7	0.05	0.00714286	0.0125595	0.4	2.6375	0	4	0.933333	0.708889	3.09601	5.5875	4.375	0	1.75	0.0535714	0.0100761	0.00405668	0.0715884	0.602857	0
IRIS_313-11751	L 10833	Xian	XI-adm	4.49651	0.916667	0.592897	2.46453	2.13333	4.10833	0	4.05	1	0.747857	4.41213	8.43333	5.9	0	1.11025	0.916667	0.792794	0.55858	0.252964	0.696328	0
IRIS_313-11752	M 6034-1	Xian	XI-1A	7	0.05	0.00714286	0.022381	0.404762	3.13333	0	4.01667	0.933333	0.704722	3.14218	7.275	4.4625	0	1.74274	0.0535714	0.0101357	0.00712275	0.0556374	0.702148	0
IRIS_313-11753	XIANG CHANG ZAO	Xian	XI-1A	4.04762	0.383333	0.286984	1.27254	1	4.40833	0	4	0.966667	0.734206	4.14013	7.45	5.635	0	1.0119	0.396552	0.390877	0.307368	0.134228	0.782313	0
IRIS_313-11754	AMBOHIMANDAY	Admix	admix	4.82108	0.833333	0.462103	1.53485	3.03333	3.32083	0	4.15	1	0.722024	3.9591	9.77083	5.48333	0	1.16171	0.833333	0.640011	0.387676	0.310448	0.605623	0
IRIS_313-11760	MENAHARA 505	Xian	XI-2	4.00603	0.766667	0.586468	2.57441	2.32857	4.37083	0.05	3.79649	0.983333	0.81631	4.26565	6.4125	5.22917	0.233333	1.05519	0.779661	0.718439	0.60352	0.36313	0.835857	0.214286
IRIS_313-11761	NS 199	Xian	XI-2	4.3054	0.716667	0.50127	2.04782	1.525	4.08333	0.133333	3.55965	0.983333	0.900476	5.18042	7.11667	5.75	0.533333	1.2095	0.728814	0.556672	0.3953	0.214286	0.710145	0.25
IRIS_313-11762	NS 1515	Xian	XI-2	4.24142	0.833333	0.597937	2.18385	1.50417	3.6875	0.15	3.41491	0.966667	0.924484	5.03479	7.53929	5.44583	0.583333	1.24203	0.862069	0.646779	0.433752	0.199511	0.677123	0.257143
IRIS_313-11763	PJ 110	Xian	XI-adm	3.99702	0.733333	0.569484	2.25836	1.98333	3.97083	0.15	3.1	1	1.05952	5.1195	6.61667	4.83333	0.9	1.28936	0.733333	0.537491	0.441128	0.299748	0.821552	0.166667
IRIS_313-11780	KILOMBERO	Xian	XI-3	4.05556	0.355556	0.0929365	0.282627	1.09375	3.1375	0.133333	4.01667	0.8	0.646243	3.06347	2.6875	4.61667	0.333333	1.00968	0.444444	0.14381	0.0922571	0.406977	0.679603	0.133333
IRIS_313-11784	MBEIMBEIHUN	Xian	XI-1B	4	0.825	0.626607	2.03489	1.30833	4.0125	0	3.56754	0.966667	0.873095	4.85939	4.89167	5.56667	0.416667	1.12122	0.853448	0.717685	0.418755	0.267462	0.720808	0
IRIS_313-11786	N'YA NOFF	Xian	XI-3	5.03409	0.666667	0.337183	1.54148	1.9625	4.57083	0	4	0.983333	0.746865	4.40033	3.82083	5.9	0	1.25852	0.677966	0.451464	0.35031	0.513631	0.774718	0
IRIS_313-11787	TANDAKAY FINGO	Xian	XI-2	4.2544	0.75	0.519643	1.90048	1.49167	3.625	0	4.01667	1	0.755357	3.71785	8.10833	4.92083	0	1.05919	0.75	0.687943	0.511177	0.183967	0.736664	0
IRIS_313-11788	CANLUBANG	Geng	GJ-adm	5.12407	0.933333	0.453056	1.58862	2.5875	3.50417	0	4.68333	1	0.58869	2.46545	5.925	4.1875	0	1.09411	0.933333	0.769599	0.644352	0.436709	0.836816	0
IRIS_313-11789	SABORAMANDALOAFO	Xian	XI-2	4.08333	0.366667	0.280992	1.08313	0.973214	3.85	0.1	3.16667	1	1.0373	5.31532	8.07917	5.12361	0.833333	1.28947	0.366667	0.270888	0.203774	0.12046	0.751423	0.12
IRIS_313-11790	VARIRANGAHY	Geng	GJ-trp	4.19658	0.333333	0.120417	0.447858	0.895833	3.8625	0	3.72895	0.983333	0.835754	4.56209	3.14167	5.4625	0.266667	1.12541	0.338983	0.144081	0.0981694	0.285146	0.707094	0.125
IRIS_313-11791	VARY LAHY	Xian	XI-2	4.45589	0.733333	0.482817	1.99932	1.23571	4.09583	0	4.01667	0.983333	0.742698	3.83354	7.675	5.15833	0	1.10935	0.745763	0.650085	0.521533	0.161005	0.794023	0
IRIS_313-11795	DA GU AI 7	Xian	XI-1A	4.18333	0.866667	0.623532	2.06161	1.33333	3.3	0.0333333	3.93158	0.966667	0.757817	3.26212	7.8875	4.30417	0.0833333	1.06403	0.896552	0.822799	0.631983	0.169044	0.766699	0.4
IRIS_313-11796	DU GEN CHUAN	Xian	XI-1A	3.94227	0.866667	0.674921	3.12379	1.93417	4.62917	0.05	3.50507	0.95	0.877103	5.36457	7.81667	6.11667	0.466667	1.12473	0.912281	0.769488	0.5823	0.247441	0.756812	0.107143
IRIS_313-11797	E ZI 32	Xian	XI-1A	4.63249	0.85	0.512262	1.7718	1.27976	3.4375	0	4	0.966667	0.734206	3.58733	8.19167	4.88333	0	1.15812	0.87931	0.697708	0.493906	0.156227	0.703925	0
IRIS_313-11798	E ZI 100	Xian	XI-1B	4.05128	0.8	0.599286	2.10266	1.68333	3.5	0	4	0.966667	0.735595	3.86907	5.59167	5.2625	0.0166667	1.01282	0.827586	0.814695	0.543455	0.301043	0.665083	0
IRIS_313-11799	E ZI 110	Xian	XI-1A	4.125	0.45	0.329286	0.68511	0.791667	2.75	0	3.53411	0.933333	0.853333	4.00352	10.0958	4.69167	0.433333	1.1672	0.482143	0.385882	0.171127	0.0784152	0.586146	0
IRIS_313-11801	FAN WU	Xian	XI-adm	4.45606	0.525	0.32375	1.4891	1.29643	3.62083	0	3.93158	0.95	0.74377	3.62522	7.7125	4.87917	0.0666667	1.1334	0.552632	0.435283	0.41076	0.168094	0.742101	0
IRIS_313-11802	JIE CAO ZHAN	Xian	XI-1A	4.14035	0.95	0.688214	3.00824	1.82917	4.37083	0	4.01667	1	0.755357	4.27171	5.80833	5.65417	0	1.03079	0.95	0.911111	0.704224	0.314921	0.773029	0
IRIS_313-11804	QUN XUAN ZAO	Xian	XI-1A	4.36752	0.633333	0.422698	1.3203	1.3125	3.12083	0	4.03509	0.95	0.713214	3.55323	6.35833	4.97917	0	1.08239	0.666667	0.592667	0.371579	0.206422	0.626778	0
IRIS_313-11805	XI HONG GU	Xian	XI-1A	4.33333	0.0666667	0.0431349	0.164751	0.595833	3.75417	0	4.01667	1	0.755357	4.55943	8.80417	6.0375	0	1.07884	0.0666667	0.0571053	0.0361343	0.0676763	0.621808	0
IRIS_313-11807	R 582	Xian	XI-adm	3.73058	0.85	0.734762	2.83257	1.67083	3.85833	0.35	3.36852	0.966667	0.948929	4.25146	7.18	4.4775	0.716667	1.10748	0.87931	0.774307	0.666259	0.232707	0.861716	0.488372
IRIS_313-11809	MHARAKA	Aus	cA (Aus)	4.25033	0.65	0.457857	2.22711	1.66667	4.89167	0	4.01667	1	0.755357	4.66008	5.58889	6.16944	0	1.05817	0.65	0.606147	0.477912	0.298211	0.792886	0
IRIS_313-11811	MOSHI	Xian	XI-2	4	0.633333	0.481032	2.33079	1.425	4.85	0	3.83333	1	0.822024	4.55447	6.86667	5.53333	0.25	1.04348	0.633333	0.58518	0.511759	0.207524	0.876506	0
IRIS_313-11814	KIKUBA	Xian	XI-3	4.58487	0.916667	0.570397	2.17369	2.23333	3.84583	0	4	0.983333	0.746865	4.21488	5.89167	5.64583	0	1.14622	0.932203	0.763721	0.515719	0.379066	0.681181	0
IRIS_313-11815	MOSHI	Xian	XI-3	3.98246	0.816667	0.625833	3.17806	2.65179	5.10238	0.0166667	3.89118	0.933333	0.745	4.16463	6.69167	5.58333	0.133333	1.02346	0.875	0.840045	0.763107	0.396282	0.913859	0.125
IRIS_313-11816	KARILETYONE	Xian	XI-adm	5.96667	0.925	0.29756	0.405527	0.9875	1.76667	0	5.00341	0.95	0.499881	1.79077	5.4375	3.57083	0	1.19252	0.973684	0.595261	0.226453	0.181609	0.494749	0
IRIS_313-11817	KHAOSAING	Xian	XI-adm	4.64099	0.766667	0.461468	2.01743	3.20417	4.33333	0	4.19591	0.916667	0.650397	3.48778	7.98333	5.35833	0	1.10608	0.836364	0.709518	0.578429	0.401357	0.808709	0
IRIS_313-11820	PAKISTANHMWE	Xian	XI-3	4.46289	0.8	0.503452	1.57328	1.70833	3.11667	0	3.89737	0.983333	0.787976	3.38281	7.35833	4.29583	0.183333	1.1451	0.813559	0.638918	0.465079	0.232163	0.725509	0
IRIS_313-11823	BHU BHUSI	Xian	XI-2	4.05588	0.925	0.68381	2.51441	1.6875	4.325	0	4	0.983333	0.746865	4.13118	8.92917	5.52917	0	1.01397	0.940678	0.915573	0.608643	0.188987	0.782216	0
IRIS_313-11824	DHANIYA PHOOL	Xian	XI-2	4.12857	0.483333	0.357659	1.52322	1.3125	4.18333	0.0166667	3.81667	1	0.824802	4.49988	5.98333	5.45417	0.233333	1.08172	0.483333	0.43363	0.338503	0.219359	0.766998	0.0714286
IRIS_313-11835	E NOI NAH	Xian	XI-adm	4.34286	0.45	0.304286	1.19567	1.40417	3.9	0	4	0.95	0.721548	3.83022	4.92083	5.30833	0	1.08571	0.473684	0.421713	0.312168	0.285351	0.734694	0
IRIS_313-11837	KHAO NAHNG PRUNG	Xian	XI-3	3.91228	0.366667	0.0569643	0.176115	1.01667	3.475	0.25	3.43762	0.933333	0.889444	4.85365	3.04583	5.39583	0.675	1.13808	0.392857	0.0640448	0.036285	0.333789	0.644015	0.123457
IRIS_313-11865	HUO QING	Xian	XI-1A	3.25731	0.95	0.959048	4.21244	1.625	4.39583	0.65	3.54561	0.983333	0.912976	4.78386	2.57083	5.22917	0.633333	0.918687	0.966102	1.05046	0.880552	0.632091	0.840637	1.18421
IRIS_313-11872	TIE ZHONG	Xian	XI-1A	4.9	1	0.562857	2.41479	1.44554	4.275	0.1	3.86667	1	0.810357	4.46609	2.71667	5.50417	0.183333	1.26724	1	0.694579	0.540693	0.532099	0.776684	0.363636
IRIS_313-11878	BAI RI XIAN	Xian	XI-1A	4.21368	0.633333	0.454643	1.71076	1.1875	3.74167	0.0333333	3.76667	1	0.840079	4.71173	7.01667	5.60833	0.266667	1.11867	0.633333	0.54119	0.363086	0.16924	0.667162	0.125
IRIS_313-11882	MAN TIAN QING	Xian	XI-1A	4.08333	0.475	0.531667	1.67097	1.09345	3.55417	0	3.10263	0.983333	1.04131	5.40713	6.37083	5.1875	0.883333	1.31609	0.483051	0.510575	0.30903	0.171634	0.685141	0
IRIS_313-11929	GILINGAN MARANGRAS	Geng	GJ-trp	4.30131	0.475	0.335774	1.30397	1.45655	3.2125	0	4	1	0.759524	3.50647	7.2	4.61667	0	1.07533	0.475	0.442085	0.371875	0.202298	0.695848	0
IRIS_313-11930	ITA 117	Xian	XI-1B	4.00088	0.983333	0.756587	3.05709	2.05	4.0375	0.15	4.25	0.933333	0.746607	3.1575	5.7	4.64167	0.183333	0.941383	1.05357	1.01337	0.968198	0.359649	0.869838	0.636364
IRIS_313-11967	TANG DU GU	Xian	XI-adm	4.77778	0.4	0.245198	1.22141	0.945833	5.01667	0.1	3.78333	1	0.851746	5.29741	2.13333	6.21667	0.416667	1.26285	0.4	0.287877	0.230566	0.443359	0.806971	0.16
IRIS_313-11968	ZHAO DAN AI	Xian	XI-1A	4.25	0.183333	0.0569643	0.178488	0.641667	3.25417	0	3.72807	0.983333	0.835754	4.02019	1.9881	4.80833	0.266667	1.14	0.186441	0.0681592	0.044398	0.322754	0.676776	0
IRIS_313-12011	YU TOU ZHONG	Xian	XI-adm	4.41176	0.85	0.56504	2.35465	1.67083	4.15417	0.1	3.93333	1	0.783135	4.60372	8.8875	5.87917	0.0833333	1.12164	0.85	0.72151	0.511466	0.187998	0.706591	0.4
IRIS_313-12033	GAO JIAO HONG	Xian	XI-1A	4.40171	0.816667	0.541111	1.66896	2.1375	3.05417	0	4	1	0.759524	2.94632	7.84167	3.87917	0	1.10043	0.816667	0.712435	0.566456	0.272582	0.787325	0
IRIS_313-12093	KARUEL	Xian	XI-adm	3.51111	0.85	0.784484	2.3094	1.49167	2.94405	0.4	3.37778	0.966667	0.934206	4.85777	4.63333	5.2125	0.6	1.03947	0.87931	0.839733	0.475403	0.321942	0.564805	0.694444
IRIS_313-12094	KASHA	Basmati	cB (Bas)	4.27953	0.95	0.657103	1.93432	1.79167	2.94583	0.05	4.15712	0.85	0.631984	2.17731	2.3375	3.37917	0.166667	1.02945	1.11765	1.03975	0.888401	0.766488	0.871763	0.1
IRIS_313-12127	INPONG	Xian	XI-3	4.27137	0.55	0.380238	1.44257	1.75417	3.7125	0	3.93333	1	0.781746	4.02502	8.1625	5.15	0.0666667	1.08594	0.55	0.486396	0.358402	0.214906	0.720874	0
IRIS_313-12217	WEONJU 8	Geng	GJ-tmp	4.84861	0.8	0.450119	1.34195	1.20833	2.97917	0	4.08333	1	0.73869	3.85856	10.1417	5.225	0	1.18741	0.8	0.609347	0.347785	0.119145	0.570175	0
IRIS_313-12222	LAM BOUN	Xian	XI-3	4.27593	0.666667	0.386071	1.19884	1.40762	3.1781	0.15	3.48779	0.833333	0.773214	3.50517	3.31667	4.53889	0.433333	1.22597	0.8	0.499307	0.34202	0.424408	0.700192	0.153846
IRIS_313-12228	SOM	Geng	GJ-sbtrp	4.69883	0.566667	0.330397	1.00547	1.6125	3.04583	0	4.20124	0.916667	0.650397	2.6841	9.62917	4.13333	0	1.11844	0.618182	0.507993	0.374602	0.16746	0.736895	0
IRIS_313-12242	KHAO KHOT	Geng	GJ-sbtrp	3.82557	0.85	0.699762	2.01296	1.71917	2.88333	0.2	3.58889	0.933333	0.836667	3.42248	4.25417	4.08333	0.383333	1.06595	0.910714	0.836369	0.588159	0.404114	0.706122	0.521739
IRIS_313-12247	DAMNOEUB KRAMOUM	Xian	XI-3	4.13333	0.266667	0.0127381	0.0484048	1.06667	3.60833	0.55	3.61316	0.983333	0.87881	4.91851	6.84583	5.5875	0.433333	1.14397	0.271186	0.0144947	0.00984135	0.155813	0.645787	0.423077
IRIS_313-12249	DAMNOUEB PHDAU PEN	Xian	XI-3	4.06054	0.716667	0.535992	1.66523	0.9625	3.0625	0	3.8808	0.95	0.763214	4.03705	5.35	5.25	0.15	1.04632	0.754386	0.702283	0.412486	0.179907	0.583333	0.333333
IRIS_313-12257	DENG PEE	Geng	GJ-sbtrp	4.13034	0.633333	0.461865	1.03814	2.35	2.23333	0	4.25475	0.833333	0.584048	2.31337	5.88333	3.90417	0	0.97076	0.76	0.7908	0.448758	0.399433	0.572038	0
IRIS_313-12263	KHIE TOM	Xian	XI-3	3.88221	0.583333	0.484167	3.56467	3.025	4.68333	0.2	3.50065	0.816667	0.7775	4.71946	2.15139	6	0.65	1.10899	0.714286	0.622722	0.755314	1.40607	0.780556	0.282051
IRIS_313-12266	KAUK PAHLING	Geng	GJ-sbtrp	5.11944	0.45	0.224008	0.95431	1.3125	4.24583	0	4.39035	0.983333	0.654365	3.48654	7.77917	5.32917	0	1.16607	0.457627	0.342329	0.273713	0.16872	0.796716	0
IRIS_313-12286	EKAYIN SAW	Xian	XI-3	3.51477	0.533333	0.508135	1.32099	1.4	2.6875	0.45	3.41078	0.95	0.927381	6.29037	5.38333	6.74583	0.825	1.03049	0.561404	0.547925	0.210002	0.260062	0.398394	0.444444
IRIS_313-12296	SABALINE	Xian	XI-3	4.8	0.25	0.142937	0.604071	1.0994	4.22917	0	4.91754	0.983333	0.549087	3.05002	1.6	5.55417	0.05	0.976097	0.254237	0.260317	0.198055	0.687128	0.76144	0
IRIS_313-12329	CHAO DO	Xian	XI-adm	3.70726	0.8	0.699008	2.03523	1.6	2.91667	0.35	3.66667	1	0.872024	3.97575	6.30833	4.55417	0.35	1.01107	0.8	0.801593	0.511911	0.253633	0.640439	1.04762
IRIS_313-12349	MAK KHEUA DENG	Geng	GJ-sbtrp	4.51282	0.65	0.410357	1.41894	2.19583	3.45417	0	4.4883	0.916667	0.587063	2.60997	7.9125	4.44167	0	1.00546	0.709091	0.699	0.543659	0.277514	0.777674	0
IRIS_313-12355	NASAENG	Xian	XI-adm	4.04635	0.833333	0.625992	2.69073	1.50714	4.30417	0.0166667	3.75117	0.95	0.800714	3.93591	5.66667	4.91667	0.25	1.07869	0.877193	0.781792	0.683635	0.265966	0.875424	0.0666667
IRIS_313-15904	JINBUBYEO	Geng	GJ-tmp	5.60366	0.45	0.179008	0.549157	1.10833	3.07917	0	4.13231	0.883333	0.64619	2.79444	8.2125	4.32083	0.0333333	1.35606	0.509434	0.27702	0.196517	0.134957	0.712633	0

## Sheet: Supplementary Table 2
Supplementary Table 2. Primers used for qRT-PCR.
Gene accession	Forward primers (5'-3')	Reverse primers (5'-3')
Actin	GCTCCGTGGCGGTATCAT	CGGCAGTTGACAGCCCTAG
LOC_Os09g25060	GTCTGCCTCGACCTCTGC	CGATTCTCCTCGCTCATCTGA
LOC_Os03g60240	GAGTACGGGCTGTCGGATC	TTAAACCATGCCCTCTAGAAGC
LOC_Os03g08960	CTGCCGCTTCTTTCAAGTTTCA	ATCTTTCTGCTCCATGGTCACC
LOC_Os01g12000	TCTAGCTCATCCCCATACCCAA	CCCATTTGGCTCTCTTCCTTTT
LOC_Os04g41410	CCGATGGCTACGAGAAGAGTTC	CAGTGTTAAGTTCCAGCCTTGC
LOC_Os11g35350	CATCACAGAGAGAGGTCGAGAG	CTCCTTATCCCCACCTTCGAC
LOC_Os12g09350	CATCTTGGTCAGGAGGAGGATC	GTTGCAGAACTTGATCCATTGC
LOC_Os12g13300	GCGCGTACTACTGGTCCG	GATCTTCAGCCGCGTTGACC

## Sheet: Supplementary Table 3
Supplementary Table 3. Summary of GWAS results.
Trait	Lead SNP	Chromosome	Locus ID	Panel	P-value	Number of significantly associated SNPs in LD (r2 ≥0.30)	Known related genes/QTLs
MGTS	rs3_4643457	3	25	Xian	2.24189e-06	1
MGTS	rs3_9919855	3	27	Xian	1.25124e-06	1
MGTS	rs3_34261591	3	32	Whole	8.50294e-08	10	qSNC3 (Li et al., 2017)
MGTS	rs3_34261591	3	32	Xian	2.15497e-08	13	qSNC3 (Li et al., 2017)
MGTS	rs7_17955714	7	55	Geng	2.79317e-06	1
MGTS	rs10_2072436	10	73	Xian	2.55818e-06	1
MGTS	rs11_14711620	11	78	Whole	1.55e-06	1
GRS	rs1_3400582	1	4	Whole	2.13015e-06	1
GRS	rs1_6533274	1	7	Whole	2.76042e-07	1
GRS	rs7_24927574	7	59	Whole	4.07074e-07	1
GRS	rs7_24927574	7	59	Xian	1.06756e-06	1
GIS	rs1_32339363	1	13	Xian	3.10862e-07	10
GIS	rs1_32341389	1	13	Whole	1.45604e-06	1
GIS	rs12_7424176	12	88	Whole	1.19011e-06	1
VIS	rs3_12165262	3	28	Whole	1.41259e-06	1
VIS	rs5_8671570	5	42	Geng	6.86849e-06	4
VIS	rs11_26533181	11	84	Xian	6.10176e-07	1
VIS	rs12_7424176	12	88	Whole	1.42799e-09	3
RLS	rs1_1045632	1	2	Geng	3.41939e-06	3
RLS	rs1_1627779	1	3	Geng	2.13881e-07	19	qSDS1 (Li et al., 2017)
RLS	rs1_3315088	1	4	Geng	7.29619e-06	1
RLS	rs1_3400740	1	4	Whole	1.17733e-07	8
RLS	rs8_1147303	8	63	Xian	1.44462e-06	1
RLS	rs8_3214496	8	65	Xian	6.83587e-07	3
RLS	rs8_3214496	8	65	Whole	1.63639e-06	1
RLS	rs8_28112332	8	69	Whole	1.70963e-06	1
SLS	rs1_36691663	1	18	Whole	1.79601e-06	1
SLS	rs5_8505151	5	41	Geng	4.5466e-07	135
SLS	rs5_23682172	5	43	Geng	4.93641e-06	1
SLS	rs5_26513244	5	46	Whole	4.06593e-09	167
SLS	rs5_26741198	5	47	Whole	8.67546e-11	19
SLS	rs7_28291124	7	62	Whole	1.12706e-06	7
SLS	rs12_7424176	12	88	Whole	2.37423e-07	1
GES	rs1_7612328	1	9	Whole	6.62723e-07	1
GES	rs1_8847257	1	10	Geng	4.18338e-06	35
GES	rs1_32604481	1	14	Whole	2.57241e-07	1
GES	rs2_456993	2	19	Xian	2.14064e-06	1
GES	rs2_8295560	2	22	Whole	1.19087e-06	1
GES	rs3_16208608	3	29	Geng	2.47141e-06	1
GES	rs5_24510401	5	44	Whole	7.04217e-07	1
GES	rs6_22250498	6	48	Geng	3.43332e-06	2
GES	rs7_7971017	7	49	Geng	9.79259e-08	9
GES	rs7_8137217	7	50	Geng	4.6425e-08	14
GES	rs7_8367791	7	51	Geng	2.65692e-06	1
GES	rs7_8834861	7	52	Geng	8.03193e-07	12
GES	rs7_15416774	7	53	Geng	2.44248e-06	1
GES	rs7_15590205	7	54	Geng	2.4494e-06	25
GES	rs7_28128160	7	61	Geng	9.91085e-07	2
GES	rs8_24108555	8	68	Geng	9.41876e-09	5	qSNC8 (Li et al., 2017)
GES	rs10_17190380	10	74	Geng	4.35988e-08	13
GES	rs10_17462992	10	75	Geng	1.58411e-06	1
GES	rs12_22669945	12	89	Xian	1.32759e-06	1
RMGT	rs1_31071	1	1	Whole	1.49838e-06	1
RMGT	rs1_1066189	1	2	Whole	1.81744e-06	1
RMGT	rs1_35430983	1	17	Whole	2.34614e-07	2
RMGT	rs3_4652485	3	25	Whole	2.20097e-08	1
RMGT	rs4_9675576	4	34	Whole	8.41791e-07	1
RMGT	rs4_21995663	4	35	Whole	1.96381e-07	1
RMGT	rs4_26818303	4	37	Geng	6.4169e-06	1
RMGT	rs4_29834573	4	38	Xian	1.8623e-06	2
RMGT	rs5_1309655	5	39	Xian	2.52764e-06	1
RMGT	rs7_20401570	7	56	Whole	1.30483e-06	2
RMGT	rs9_14441669	9	70	Whole	1.91178e-06	1
RMGT	rs10_21430230	10	76	Whole	9.08388e-07	1
RMGT	rs11_27697106	11	85	Geng	1.19615e-06	4
RMGT	rs11_28916361	11	86	Xian	1.05889e-06	1
RGR	rs1_3400582	1	4	Whole	1.10025e-06	1
RGR	rs1_6533274	1	7	Whole	2.32583e-07	1
RGR	rs1_20271680	1	12	Whole	1.20632e-06	1
RGR	rs7_24927574	7	59	Whole	4.57385e-07	1
RGR	rs7_24927574	7	59	Xian	9.307e-07	1
RGI	rs1_3400669	1	4	Whole	8.98899e-07	7
RVI	rs1_1630719	1	3	Geng	2.43538e-06	1	qSDS1 (Li et al., 2017)
RVI	rs1_6533274	1	7	Whole	1.19809e-06	1
RVI	rs12_7424176	12	88	Whole	2.60637e-07	1
RRL	rs1_1630880	1	3	Geng	7.21165e-08	129	qSDS1 (Li et al., 2017)
RRL	rs1_3574613	1	5	Geng	1.6845e-06	3
RRL	rs1_3604516	1	5	Geng	4.38269e-06	9
RRL	rs1_6267111	1	6	Geng	2.94363e-06	2
RRL	rs1_6350836	1	6	Geng	1.07503e-06	9
RRL	rs2_2347193	2	20	Geng	3.99009e-06	1
RRL	rs2_7955359	2	21	Whole	7.58142e-07	1
RRL	rs2_11448809	2	23	Whole	2.32081e-08	1
RRL	rs2_25506924	2	24	Geng	2.02879e-07	2
RRL	rs3_6022270	3	26	Whole	1.59115e-07	1	qSKC3 (Li et al., 2017)
RRL	rs3_27732037	3	31	Whole	9.32939e-07	1
RRL	rs3_35201895	3	33	Xian	7.44918e-07	4	qSNC3 (Li et al., 2017)
RRL	rs5_2382165	5	40	Whole	1.59963e-07	1
RRL	rs5_24507498	5	44	Whole	2.24134e-08	2
RRL	rs5_24507498	5	44	Xian	1.03432e-06	1
RRL	rs5_24966827	5	45	Xian	9.1559e-07	1
RRL	rs5_24966827	5	45	Whole	1.73964e-07	1
RRL	rs7_21247103	7	57	Geng	6.68352e-06	1
RRL	rs8_2282935	8	64	Whole	5.64056e-07	2
RRL	rs8_3949443	8	66	Xian	2.68044e-06	1
RRL	rs9_14582678	9	70	Geng	2.82381e-06	1
RRL	rs9_14985169	9	71	Whole	2.09228e-06	1	OsWRKY76 (Ross et al., 2007)
RRL	rs9_17618151	9	72	Whole	3.26904e-08	3
RRL	rs11_13797987	11	77	Whole	4.97329e-07	1
RRL	rs11_14657643	11	78	Whole	8.95083e-07	1
RRL	rs11_16230877	11	79	Whole	1.99982e-06	1
RRL	rs11_18108187	11	80	Geng	1.00165e-06	1
RRL	rs11_18829913	11	81	Xian	1.90224e-06	2
RRL	rs11_18830066	11	81	Whole	5.93223e-07	3
RRL	rs11_20724735	11	82	Whole	8.17874e-07	1
RRL	rs11_20724735	11	82	Xian	1.01488e-07	1
RRL	rs11_24965893	11	83	Geng	9.20446e-07	3
RSL	rs8_17550068	8	67	Geng	4.92365e-07	56	OsRLCK253 (Giri et al., 2011)
RSL	rs12_7408899	12	88	Geng	3.74908e-06	1
RSL	rs12_26284167	12	90	Geng	6.09608e-06	1	OsNCED5 (Xiong et al., 2014)
RGE	rs1_6836437	1	8	Whole	4.09028e-07	1
RGE	rs1_9103059	1	11	Whole	1.57e-06	1
RGE	rs1_34887876	1	15	Whole	3.48444e-07	2
RGE	rs1_35049193	1	16	Whole	1.99998e-06	1
RGE	rs1_35049193	1	16	Xian	2.12612e-06	1
RGE	rs3_21162928	3	30	Geng	7.73574e-06	1
RGE	rs4_24555609	4	36	Whole	9.75119e-08	2
RGE	rs5_24508974	5	44	Whole	1.17698e-06	1
RGE	rs7_24380674	7	58	Whole	7.91408e-07	1
RGE	rs7_27022871	7	60	Whole	2.01368e-06	1
RGE	rs7_27022871	7	60	Xian	7.93509e-07	1
RGE	rs8_24108555	8	68	Geng	1.28503e-08	5	qSNC8 (Li et al., 2017)
RGE	rs10_17190380	10	74	Geng	2.41887e-06	5
RGE	rs12_4899993	12	87	Xian	1.34383e-07	1

## Sheet: Supplementary Table 4
Supplementary Table 4. The list of 17 candidate genes.
Locus ID	Chromosome	Lead SNP	Gene with lead SNP	Candidate gene	Annotation
3	1	rs1_1627779	LOC_Os01g03840-LOC_Os01g03860	LOC_Os01g03860	The lead SNP which was significantly associated with RL and RRL in Geng population
4	1	rs1_3400582	LOC_Os01g07200-LOC_Os01g07212	LOC_Os01g07212	Associated with GRS, RGR, RGI in the whole population
7	1	rs1_6533274	LOC_Os01g11990-LOC_Os01g12000	LOC_Os01g12000	Associated with GRS, RGR, RVI in the whole population
32	3	rs3_34261591	LOC_Os03g60240	LOC_Os03g60240	The lead SNP which was significantly associated with MGTS in whole and Xian subpopulation
25	3	rs3_4652485	LOC_Os03g08960	LOC_Os03g08960	The lead SNP which was significantly associated with RMGT in whole population
36	4	rs4_24555609	LOC_Os04g41410-LOC_Os04g41430	LOC_Os04g41410	The lead SNP which was significantly associated with RGE in whole population
				LOC_Os04g41430
44	5	rs5_24507498	LOC_Os05g41850	LOC_Os05g41850	The lead SNP which was significantly associated with RRL in whole population
47	5	rs5_26741198	LOC_Os05g46110	LOC_Os05g46110	The lead SNP which was significantly associated with SLS in whole population
67	8	rs8_17550068	LOC_Os08g28710	LOC_Os08g28710	OsRLCK253, a receptor-like cytoplasmic kinase gene, improve salt stress tolerance
68	8	rs8_24108555	LOC_Os08g38050	LOC_Os08g38050	The lead SNP which was significantly associated with GES and RGE in Geng population
71	9	rs9_14985169	LOC_Os09g25060-LOC_Os09g25070	LOC_Os09g25060	OsWRKY76, a WRKY transcription factor
82	11	rs11_20724735	LOC_Os11g35350	LOC_Os11g35350	The lead SNP which was significantly associated with RRL in Xian population
90	12	rs12_26284167	LOC_Os12g42280-LOC_Os12g42284	LOC_Os12g42280	OsNCED5, a 9-cis-epoxycarotenoid dioxygenase, regulates salt stress tolerance
87	12	rs12_4899993	LOC_Os12g09340-LOC_Os12g09350	LOC_Os12g09340	The lead SNP which was significantly associated with RGE in Xian population
				LOC_Os12g09350
88	12	rs12_7424176	LOC_Os12g13300	LOC_Os12g13300	The lead SNP which was significantly associated with VIS in whole population and co-identified in GIS, RVI, SLS
